# Supplementary material
Source: Research Square preprint supplement (doi:10.21203/rs.3.rs-9129596/v1)
Supplement: Supplementary file 1 [file 5a96a579c26e58e706dc088d.xlsx]

## Sheet: Tables S3
Tables S3. The intersection between differentially expressed genes (DEGs) and folate metabolism related genes (FMRGs)
ABCA1
ABCB1
ABO
ADH1B
ALB
ALDH1A2
ALDH1L1
ALX1
AOX1
ARG2
CD36
CDH1
CDKN2A
CHDH
CRABP1
CRABP2
CTH
CYP26B1
DDC
EPO
ERBB2
FASLG
FDXR
FOLR1
FOLR2
FOLR3
FTH1
GDF6
GLDC
GRHL2
HLA-DQA1
HLA-DQB1
IRF6
MARCKS
MT-TL1
MYEOV
NAP1L2
NFKB2
NGF
NNMT
NOS1
PAPPA
PDGFRA
PHGDH
PLEKHB1
PRKCA
PRSS8
RUNX3
SHMT1
SHMT2
SHROOM3
SLC19A2
SLC6A19
TFAP2A
TGFB1
TIMP3
TYMP
TYMS
VDR
VEGFA
VIM
