# Supplementary material
Source: Research Square preprint supplement (doi:10.21203/rs.3.rs-9129596/v1)
Supplement: Supplementary file 2 [file 5e65ffa0e1ac460afca30acf.xlsx]

## Sheet: Tables S2
Tables S2. Folate metabolism related differentially expressed genes
Gene	Regulation
AQP2	Down regulated
PRR35	Down regulated
KCNJ10	Down regulated
SLC9A4	Down regulated
HS6ST2	Down regulated
ACPP	Down regulated
MUC15	Down regulated
DUSP9	Down regulated
TFAP2B	Down regulated
SLC12A1	Down regulated
LINC02437	Down regulated
LINC00864	Down regulated
KNG1	Down regulated
AP005432.2	Down regulated
IRX2	Down regulated
AC007993.2	Down regulated
AC016526.1	Down regulated
GPC5	Down regulated
ATP12A	Down regulated
UMOD	Down regulated
CASR	Down regulated
KCNJ1	Down regulated
FXYD4	Down regulated
LINC01762	Down regulated
RALYL	Down regulated
ESRRB	Down regulated
AL031726.1	Down regulated
NELL1	Down regulated
TRPV6	Down regulated
TMEM207	Down regulated
CLDN16	Down regulated
LINC01983	Down regulated
HRG	Down regulated
MFSD4A	Down regulated
GP2	Down regulated
NRK	Down regulated
CLDN19	Down regulated
AC073172.1	Down regulated
COL4A6	Down regulated
ERVMER34-1	Down regulated
AC104237.3	Down regulated
PTGER1	Down regulated
CA10	Down regulated
OVCH2	Down regulated
AC087045.3	Down regulated
IRX1	Down regulated
SFRP1	Down regulated
ELF5	Down regulated
TYRP1	Down regulated
ERVE-1	Down regulated
SIM2	Down regulated
AP000696.1	Down regulated
RANBP3L	Down regulated
AC104237.2	Down regulated
SCNN1G	Down regulated
LINC00982	Down regulated
GGT6	Down regulated
EHF	Down regulated
AC092078.2	Down regulated
FOXCUT	Down regulated
GABRA2	Down regulated
ADGRF3	Down regulated
FAM3B	Down regulated
KLHL14	Down regulated
CCDC181	Down regulated
TNNI1	Down regulated
WNK4	Down regulated
EGF	Down regulated
ACOT12	Down regulated
SERPINA5	Down regulated
F11	Down regulated
CLDN8	Down regulated
GATA3-AS1	Down regulated
LHX1-DT	Down regulated
AC090709.1	Down regulated
PIK3C2G	Down regulated
NAT8L	Down regulated
PLPPR1	Down regulated
AC124017.1	Down regulated
PRDM16	Down regulated
SLC15A2	Down regulated
PRR15	Down regulated
ARMH4	Down regulated
LINC02343	Down regulated
TCF21	Down regulated
LINC00645	Down regulated
SCNN1B	Down regulated
NHLRC4	Down regulated
LINC01976	Down regulated
FAM167A	Down regulated
CLCNKA	Down regulated
MCCD1	Down regulated
LINC00379	Down regulated
TMEM45B	Down regulated
CALB1	Down regulated
RBP2	Down regulated
LINC02038	Down regulated
SPTBN2	Down regulated
ADH1C	Down regulated
TNNC1	Down regulated
AC107057.1	Down regulated
LRRC2	Down regulated
LINC01571	Down regulated
ADGRF1	Down regulated
NOS1	Down regulated
TMEM52B	Down regulated
CLCNKB	Down regulated
MYO3B	Down regulated
HYKK	Down regulated
FLRT1	Down regulated
AC007906.2	Down regulated
LINC02121	Down regulated
ERBB4	Down regulated
CNTN1	Down regulated
PAK6	Down regulated
TMEM178A	Down regulated
MAPK4	Down regulated
PAPPA	Down regulated
TMPRSS2	Down regulated
TMEM213	Down regulated
AC106772.2	Down regulated
MRAP2	Down regulated
MTURN	Down regulated
CHL1	Down regulated
AKAP3	Down regulated
SIRLNT	Down regulated
AL139280.1	Down regulated
AL049838.1	Down regulated
TMPRSS4	Down regulated
COL26A1	Down regulated
GAL3ST3	Down regulated
ENSG00000288046	Down regulated
LINC01543	Down regulated
PROM2	Down regulated
SLC12A3	Down regulated
RNF150	Down regulated
GPC3	Down regulated
KLRG2	Down regulated
PTCSC3	Down regulated
VTCN1	Down regulated
LMO3	Down regulated
EPN3	Down regulated
SOST	Down regulated
C1orf226	Down regulated
SLC4A1	Down regulated
ATP1A1	Down regulated
SRGAP3	Down regulated
AC023154.1	Down regulated
HSPA2	Down regulated
CHGB	Down regulated
OVOL2	Down regulated
SMIM5	Down regulated
GRHL2	Down regulated
AC108860.2	Down regulated
SLC2A12	Down regulated
FECH	Down regulated
FREM1	Down regulated
SUSD4	Down regulated
AL035661.1	Down regulated
SLC52A3	Down regulated
WNT9B	Down regulated
GSTM3	Down regulated
KLK6	Down regulated
ITLN1	Down regulated
LINC01055	Down regulated
RASSF10	Down regulated
DDN	Down regulated
LHX1	Down regulated
EYA4	Down regulated
NPHS2	Down regulated
BSND	Down regulated
PRRG2	Down regulated
EPB41L4B	Down regulated
LINC01606	Down regulated
SLC13A2	Down regulated
FAM81A	Down regulated
RPS6KA6	Down regulated
ESRRG	Down regulated
CPAMD8	Down regulated
MPP7	Down regulated
MFSD6L	Down regulated
ENPP6	Down regulated
GATA3	Down regulated
LINC01020	Down regulated
AL353152.1	Down regulated
TSPAN8	Down regulated
AC112243.1	Down regulated
MAP6	Down regulated
RAB25	Down regulated
KLK7	Down regulated
ATP6V0A4	Down regulated
SOWAHA	Down regulated
PROX1	Down regulated
COBLL1	Down regulated
FAM83B	Down regulated
SLC4A11	Down regulated
AVPR2	Down regulated
EMX1	Down regulated
AC119427.1	Down regulated
DBT	Down regulated
AC025154.2	Down regulated
NIPAL1	Down regulated
FOLR3	Down regulated
NR0B2	Down regulated
ERMP1	Down regulated
NPHS1	Down regulated
SEMA6D	Down regulated
FRMD7	Down regulated
KCNK13	Down regulated
LIPH	Down regulated
VGLL1	Down regulated
TFCP2L1	Down regulated
S100A2	Down regulated
PIP4K2C	Down regulated
PLCL1	Down regulated
FAM222A	Down regulated
PRKAR2B	Down regulated
AP000757.1	Down regulated
SYT7	Down regulated
GRIK5	Down regulated
L1CAM	Down regulated
MAP3K15	Down regulated
CRHBP	Down regulated
CEL	Down regulated
FGF1	Down regulated
LINC02568	Down regulated
MECOM	Down regulated
TAGLN3	Down regulated
BMP7	Down regulated
AC104984.4	Down regulated
FGF9	Down regulated
AC241644.2	Down regulated
NPY5R	Down regulated
AC019080.1	Down regulated
SLC4A9	Down regulated
TMEM30B	Down regulated
AL161668.4	Down regulated
RHCG	Down regulated
HS6ST1	Down regulated
RAB11FIP4	Down regulated
NTNG1	Down regulated
AC092813.2	Down regulated
AMPH	Down regulated
AC079310.1	Down regulated
ABHD17C	Down regulated
SLC16A5	Down regulated
CARMIL1	Down regulated
SLC9A2	Down regulated
TMEM164	Down regulated
ESRP1	Down regulated
AC105384.1	Down regulated
COL4A5	Down regulated
FAM169A	Down regulated
EFHD1	Down regulated
NUDT10	Down regulated
SLC26A7	Down regulated
PPP1R1B	Down regulated
SLC20A2	Down regulated
EPB41L5	Down regulated
AQP6	Down regulated
AC087762.1	Down regulated
ENSG00000287497	Down regulated
SUCLG1	Down regulated
HOXB9	Down regulated
SLC25A5-AS1	Down regulated
KLHL13	Down regulated
LGI2	Down regulated
AK3	Down regulated
CYP2B6	Down regulated
RALBP1	Down regulated
PAPPA2	Down regulated
PLA2G4F	Down regulated
TJP3	Down regulated
SOSTDC1	Down regulated
IYD	Down regulated
SEMA3B-AS1	Down regulated
HADH	Down regulated
PDE1A	Down regulated
AC139769.1	Down regulated
NUPR2	Down regulated
DCAF11	Down regulated
TDGF1	Down regulated
RNU7-159P	Down regulated
HOXB-AS3	Down regulated
AMFR	Down regulated
GCGR	Down regulated
CLDN14	Down regulated
MPPED2	Down regulated
FOXC1	Down regulated
SIM1	Down regulated
GALNT3	Down regulated
AC019197.1	Down regulated
ATP6V1G3	Down regulated
PRSS22	Down regulated
AC103563.7	Down regulated
HPCAL4	Down regulated
C1orf116	Down regulated
SCNN1A	Down regulated
SLC22A8	Down regulated
TCEAL2	Down regulated
ANXA9	Down regulated
FAM171A1	Down regulated
SLC47A2	Down regulated
AC130371.2	Down regulated
NAALADL2	Down regulated
FOXJ1	Down regulated
AREL1	Down regulated
AC006441.4	Down regulated
TACSTD2	Down regulated
INPP5J	Down regulated
DNASE1	Down regulated
CADPS2	Down regulated
FMO5	Down regulated
LZTS3	Down regulated
C2orf15	Down regulated
USP46-AS1	Down regulated
XPNPEP2	Down regulated
DUSP26	Down regulated
HSD11B2	Down regulated
CCDC160	Down regulated
PTPN13	Down regulated
PAQR7	Down regulated
RPS24P17	Down regulated
SLC7A8	Down regulated
ATP6V0D2	Down regulated
ENSG00000287906	Down regulated
NUDT4	Down regulated
DIO1	Down regulated
CA8	Down regulated
DNER	Down regulated
MRPL33	Down regulated
EPCAM	Down regulated
UPP2	Down regulated
SSC4D	Down regulated
SLC48A1	Down regulated
ANKRD2	Down regulated
COL4A4	Down regulated
AC144831.1	Down regulated
SLC25A33	Down regulated
LMX1B	Down regulated
KCNJ12	Down regulated
LYPD6B	Down regulated
REEP6	Down regulated
AIF1L	Down regulated
ANGPTL1	Down regulated
C16orf89	Down regulated
HNF4A-AS1	Down regulated
USP46	Down regulated
LINC01159	Down regulated
AC073174.2	Down regulated
AL355877.1	Down regulated
MARVELD2	Down regulated
FOXI1	Down regulated
ARL4D	Down regulated
ABCA4	Down regulated
KCTD1	Down regulated
B4GALNT2	Down regulated
UXS1	Down regulated
ASB15	Down regulated
TMEM61	Down regulated
CNKSR1	Down regulated
PDHB	Down regulated
SLC5A2	Down regulated
DMRT2	Down regulated
AC005082.1	Down regulated
BX547991.1	Down regulated
CROT	Down regulated
CWH43	Down regulated
RNF212B	Down regulated
OPHN1	Down regulated
CYFIP2	Down regulated
DTX1	Down regulated
MAB21L4	Down regulated
SLC25A35	Down regulated
PRMT6	Down regulated
HOXD8	Down regulated
MAN1C1	Down regulated
AC104794.4	Down regulated
TUBB2B	Down regulated
HOMER1	Down regulated
AC093627.7	Down regulated
PPM1K	Down regulated
CLIC5	Down regulated
DACH1	Down regulated
PLPP4	Down regulated
ATP6V1C2	Down regulated
CGN	Down regulated
AC148477.4	Down regulated
ACSF2	Down regulated
SH3GL2	Down regulated
CLDN10-AS1	Down regulated
PCP4	Down regulated
LYPD6	Down regulated
MAL	Down regulated
SFXN2	Down regulated
LINC02381	Down regulated
AC018541.1	Down regulated
MST1L	Down regulated
GHITM	Down regulated
OXGR1	Down regulated
AC011297.1	Down regulated
RASSF8	Down regulated
RALGPS1	Down regulated
ADAMTS16	Down regulated
APEH	Down regulated
GAS1	Down regulated
CTH	Down regulated
RPRM	Down regulated
AL157373.2	Down regulated
NCCRP1	Down regulated
PARD3B	Down regulated
SLC9A3	Down regulated
DPP6	Down regulated
AP1M2	Down regulated
CLSTN2	Down regulated
CNP	Down regulated
FGD5-AS1	Down regulated
TPTEP1	Down regulated
WNK1	Down regulated
ALDH6A1	Down regulated
NAV2	Down regulated
DANCR	Down regulated
MAGI3	Down regulated
STRA6	Down regulated
PLA2R1	Down regulated
ATP5F1A	Down regulated
LINC02417	Down regulated
SLC36A2	Down regulated
THRB	Down regulated
SLC7A13	Down regulated
FRG2C	Down regulated
GMPR	Down regulated
ACSL4	Down regulated
GPM6B	Down regulated
LAD1	Down regulated
MTMR10	Down regulated
GABARAPL1	Down regulated
B4GALNT3	Down regulated
CDH3	Down regulated
ACOT11	Down regulated
PCCB	Down regulated
ADK	Down regulated
AL031710.1	Down regulated
MT1H	Down regulated
MIR200CHG	Down regulated
DEGS2	Down regulated
SSTR5	Down regulated
DAG1	Down regulated
SHISA2	Down regulated
SUCLG2	Down regulated
PLEKHB1	Down regulated
DEPTOR	Down regulated
HEPACAM2	Down regulated
SREBF2	Down regulated
NR3C2	Down regulated
ST6GAL1	Down regulated
HSPB7	Down regulated
SELENBP1	Down regulated
CDH16	Down regulated
ARHGAP24	Down regulated
CCDC186	Down regulated
PROZ	Down regulated
HACD3	Down regulated
SYNE4	Down regulated
MCF2L-AS1	Down regulated
C5orf67	Down regulated
MPC1	Down regulated
KCNQ1	Down regulated
AC007342.4	Down regulated
LURAP1	Down regulated
CLDN11	Down regulated
LINC01612	Down regulated
ECHS1	Down regulated
CNTD2	Down regulated
PDP2	Down regulated
CYP4F2	Down regulated
ACADSB	Down regulated
ATP6V1H	Down regulated
ENOX1	Down regulated
HOXB6	Down regulated
FOXA3	Down regulated
SLC30A2	Down regulated
BMPR1B	Down regulated
AC079848.1	Down regulated
BTG2	Down regulated
RAPGEF3	Down regulated
PTPRO	Down regulated
IRF2BPL	Down regulated
RAP1GAP	Down regulated
GPAT3	Down regulated
FDX1	Down regulated
ERICH4	Down regulated
ABAT	Down regulated
UQCRFS1	Down regulated
OVOL1	Down regulated
CMTM4	Down regulated
AC092325.1	Down regulated
GLDC	Down regulated
SLC25A25	Down regulated
RHBG	Down regulated
KDF1	Down regulated
ADH1B	Down regulated
EPHA1	Down regulated
NXPH2	Down regulated
CORO2B	Down regulated
LRRN2	Down regulated
OLFM4	Down regulated
COL9A2	Down regulated
GLOD5	Down regulated
KIAA1522	Down regulated
MBOAT2	Down regulated
MPP5	Down regulated
ENSG00000287627	Down regulated
HPD	Down regulated
CAB39L	Down regulated
CHP1	Down regulated
DHRS11	Down regulated
PDHA1	Down regulated
GOT2	Down regulated
ILDR1	Down regulated
AL391121.1	Down regulated
ACAA1	Down regulated
TMEM72	Down regulated
CAPS	Down regulated
AC015910.1	Down regulated
SLC13A3	Down regulated
TSPAN6	Down regulated
ZNF503-AS2	Down regulated
FBXO2	Down regulated
CTSV	Down regulated
AFM	Down regulated
IGSF11	Down regulated
SLC16A7	Down regulated
PEBP1	Down regulated
BCAM	Down regulated
CLDN10	Down regulated
GLRX5	Down regulated
ALB	Down regulated
C5orf38	Down regulated
AC007996.1	Down regulated
PPM1H	Down regulated
LARS2	Down regulated
DNAJC11	Down regulated
OCLN	Down regulated
THSD4	Down regulated
DCXR	Down regulated
USP53	Down regulated
MRGPRF	Down regulated
NAP1L2	Down regulated
PHYHD1	Down regulated
SORT1	Down regulated
MAL2	Down regulated
FABP1	Down regulated
SYNJ2BP	Down regulated
SGPP1	Down regulated
CALCA	Down regulated
SLC26A4	Down regulated
AL731733.1	Down regulated
SLC14A2	Down regulated
PLXNB1	Down regulated
ACTRT3	Down regulated
TGFBR3	Down regulated
TUBAL3	Down regulated
BTC	Down regulated
ERBB2	Down regulated
PNP	Down regulated
DNASE1L3	Down regulated
DYNLL2	Down regulated
C7	Down regulated
S100A14	Down regulated
AC023421.1	Down regulated
GPD1L	Down regulated
CNGA1	Down regulated
ZHX3	Down regulated
TOX3	Down regulated
SCPEP1	Down regulated
SLC25A5	Down regulated
RASD1	Down regulated
ZDHHC2	Down regulated
MT1G	Down regulated
PAQR5	Down regulated
UQCRC1	Down regulated
SAMD12	Down regulated
NAPEPLD	Down regulated
SLC14A1	Down regulated
AL355102.4	Down regulated
NDUFS1	Down regulated
CGNL1	Down regulated
DIRAS1	Down regulated
CTNNAL1	Down regulated
AFAP1L2	Down regulated
SHROOM3	Down regulated
ERP27	Down regulated
HOXB5	Down regulated
TBC1D4	Down regulated
POMGNT2	Down regulated
NUAK2	Down regulated
PFKFB2	Down regulated
WNT7B	Down regulated
TRIM2	Down regulated
CR2	Down regulated
MRO	Down regulated
RDH10	Down regulated
HOXB8	Down regulated
VWA7	Down regulated
AL162171.1	Down regulated
ATP5F1B	Down regulated
SERPINA4	Down regulated
ALX1	Down regulated
CTDSPL	Down regulated
PTH1R	Down regulated
DPEP1	Down regulated
ESRP2	Down regulated
TBX3	Down regulated
HSP90AA1	Down regulated
PDGFRA	Down regulated
BSPRY	Down regulated
PLAT	Down regulated
MYO6	Down regulated
FYB2	Down regulated
C21orf62	Down regulated
CYP27B1	Down regulated
PADI2	Down regulated
DIRAS3	Down regulated
SHISA3	Down regulated
CDKL1	Down regulated
AKIRIN1	Down regulated
IPO13	Down regulated
SLC29A2	Down regulated
ALAD	Down regulated
AP000894.4	Down regulated
TENT5B	Down regulated
AQP3	Down regulated
PRDX3	Down regulated
OAT	Down regulated
CBLC	Down regulated
AGR2	Down regulated
ANK2	Down regulated
AC027288.3	Down regulated
MYH10	Down regulated
HUNK	Down regulated
C3orf85	Down regulated
CTXN3	Down regulated
BAG1	Down regulated
TMC4	Down regulated
AL353801.1	Down regulated
BCKDHB	Down regulated
TMEM86A	Down regulated
RIOX2	Down regulated
SLC34A1	Down regulated
NHSL1	Down regulated
MYORG	Down regulated
ATP1B1	Down regulated
PALM	Down regulated
ITGB6	Down regulated
MAN1A1	Down regulated
AC093496.1	Down regulated
COL4A3	Down regulated
PRR15L	Down regulated
KIF13B	Down regulated
PPP1R1A	Down regulated
SCOC	Down regulated
DCN	Down regulated
PIP5K1B	Down regulated
GSTO2	Down regulated
ANO5	Down regulated
TFAP2A	Down regulated
CYSTM1	Down regulated
KRT7	Down regulated
THSD7A	Down regulated
SORD	Down regulated
MAGI2-AS3	Down regulated
BDH1	Down regulated
C3orf52	Down regulated
BEX3	Down regulated
ALAS1	Down regulated
AC103563.2	Down regulated
CAT	Down regulated
VWA8	Down regulated
PCCA	Down regulated
FRK	Down regulated
TSPAN33	Down regulated
PELI2	Down regulated
TSPYL4	Down regulated
LDHD	Down regulated
TYRO3	Down regulated
NECTIN4	Down regulated
VAT1L	Down regulated
FAM151A	Down regulated
HIBADH	Down regulated
SMIM10L2B	Down regulated
CTSH	Down regulated
ARNT2	Down regulated
TCIM	Down regulated
CTXND1	Down regulated
PRSS35	Down regulated
IGFBP2	Down regulated
ALDH1A2	Down regulated
CLMN	Down regulated
NDUFA4	Down regulated
TRAM1L1	Down regulated
CA2	Down regulated
NINL	Down regulated
JMY	Down regulated
CCL11	Down regulated
ACADM	Down regulated
GNG7	Down regulated
SCIN	Down regulated
PRPS2	Down regulated
PPARGC1A	Down regulated
SCCPDH	Down regulated
APLP2	Down regulated
IDH2	Down regulated
LINC02061	Down regulated
MFAP3L	Down regulated
CDO1	Down regulated
PVALB	Down regulated
MAMDC2	Down regulated
PEPD	Down regulated
MISP3	Down regulated
TWSG1	Down regulated
ANXA3	Down regulated
LRBA	Down regulated
BICDL1	Down regulated
TSPYL5	Down regulated
ITM2C	Down regulated
GPR27	Down regulated
EVPL	Down regulated
GRAMD1C	Down regulated
ENSG00000287591	Down regulated
TRNP1	Down regulated
HIGD1A	Down regulated
WLS	Down regulated
SUSD1	Down regulated
ATP6V1A	Down regulated
LNX1	Down regulated
L2HGDH	Down regulated
APOO	Down regulated
DEFB1	Down regulated
AGXT	Down regulated
TBC1D9	Down regulated
MCCC1	Down regulated
GABRP	Down regulated
ATP5MC3	Down regulated
NTRK2	Down regulated
SFTA2	Down regulated
NPNT	Down regulated
RBM47	Down regulated
PRRG1	Down regulated
HPGD	Down regulated
CYS1	Down regulated
CYP39A1	Down regulated
FREM2	Down regulated
PTGR1	Down regulated
NDNF	Down regulated
CRB2	Down regulated
LLGL2	Down regulated
SDHD	Down regulated
VAV3	Down regulated
COLCA1	Down regulated
GCNT4	Down regulated
ABTB2	Down regulated
ENAM	Down regulated
MUT	Down regulated
HOXA7	Down regulated
CDKL2	Down regulated
AC084759.3	Down regulated
PRKCQ	Down regulated
STAP1	Down regulated
MYH14	Down regulated
UGT8	Down regulated
MYOZ1	Down regulated
ADAMTS15	Down regulated
SVIP	Down regulated
LINC01230	Down regulated
KCNJ13	Down regulated
CHAC1	Down regulated
BPHL	Down regulated
MSI2	Down regulated
GGACT	Down regulated
FA2H	Down regulated
LINC00284	Down regulated
PLAU	Down regulated
HMGCS2	Down regulated
PNMA8A	Down regulated
FBXO21	Down regulated
GATA2	Down regulated
AUH	Down regulated
MOXD1	Down regulated
SLC27A4	Down regulated
PTGER3	Down regulated
CYP17A1	Down regulated
PBX1	Down regulated
FAM180A	Down regulated
HOGA1	Down regulated
CNTN3	Down regulated
TSPYL1	Down regulated
ZNRF3	Down regulated
UCHL1	Down regulated
SLC25A4	Down regulated
AL031429.2	Down regulated
LINC01896	Down regulated
NNT	Down regulated
PLCXD3	Down regulated
OGDHL	Down regulated
TMEM245	Down regulated
FBP1	Down regulated
PTPN3	Down regulated
KITLG	Down regulated
VEPH1	Down regulated
AC073174.1	Down regulated
LRRC19	Down regulated
PCYT2	Down regulated
SLC22A7	Down regulated
PRKCA	Down regulated
SLC44A4	Down regulated
SGK2	Down regulated
ZMYND12	Down regulated
CBR1	Down regulated
ALS2CL	Down regulated
AC091563.1	Down regulated
AMBP	Down regulated
DLD	Down regulated
OXCT1	Down regulated
H1F0	Down regulated
CDS1	Down regulated
DNAJC6	Down regulated
ABCA8	Down regulated
PALM3	Down regulated
BMP6	Down regulated
ATP6V0E2	Down regulated
NTN4	Down regulated
LINC01187	Down regulated
NDRG2	Down regulated
ASS1	Down regulated
IRF6	Down regulated
SLC38A3	Down regulated
GLTP	Down regulated
LMO7	Down regulated
TPD52L1	Down regulated
MOB1B	Down regulated
PACRG	Down regulated
SAT2	Down regulated
PTGFR	Down regulated
NEBL	Down regulated
FAM107A	Down regulated
SCD5	Down regulated
LINC01874	Down regulated
DUSP15	Down regulated
ALDOB	Down regulated
COX7A2P1	Down regulated
CHRDL1	Down regulated
TMEM116	Down regulated
IGSF3	Down regulated
GLB1	Down regulated
BCL2L10	Down regulated
FHOD3	Down regulated
MAP9	Down regulated
ARG2	Down regulated
PRSS8	Down regulated
SLC34A3	Down regulated
PLS3	Down regulated
MFHAS1	Down regulated
ITPR2	Down regulated
BLNK	Down regulated
MARVELD3	Down regulated
SLC25A30	Down regulated
PRKD1	Down regulated
PXK	Down regulated
SLC5A3	Down regulated
LAPTM4B	Down regulated
WT1	Down regulated
RHOBTB3	Down regulated
JUP	Down regulated
SEMA4A	Down regulated
VWA5A	Down regulated
ABCB1	Down regulated
LINC02303	Down regulated
CADM4	Down regulated
PLEKHB2	Down regulated
SUCNR1	Down regulated
APP	Down regulated
KLHL3	Down regulated
SOD3	Down regulated
ANKRD9	Down regulated
DPT	Down regulated
TMEM25	Down regulated
GRB14	Down regulated
KCNJ16	Down regulated
SLC39A4	Down regulated
ACSM3	Down regulated
VDR	Down regulated
CYP26B1	Down regulated
ADTRP	Down regulated
GPRC5B	Down regulated
LDHB	Down regulated
ASAP3	Down regulated
GALM	Down regulated
NAP1L3	Down regulated
ANK3	Down regulated
USP2	Down regulated
MUC1	Down regulated
SYPL2	Down regulated
OR7E14P	Down regulated
C2orf40	Down regulated
FBLN5	Down regulated
ATP8B1	Down regulated
SLC22A13	Down regulated
PLA2G4A	Down regulated
PFKM	Down regulated
DAO	Down regulated
CDH1	Down regulated
FGF14-AS2	Down regulated
PSAT1	Down regulated
CAPN5	Down regulated
PANK1	Down regulated
DCDC2	Down regulated
ASAP2	Down regulated
NCS1	Down regulated
CDKN1C	Down regulated
SLC43A1	Down regulated
ABLIM1	Down regulated
GOT1	Down regulated
IL1RL1	Down regulated
SEMA3G	Down regulated
WDR72	Down regulated
ALDH5A1	Down regulated
GRB7	Down regulated
PARD6A	Down regulated
ALDH4A1	Down regulated
PCK2	Down regulated
AC016705.2	Down regulated
SYNE2	Down regulated
FMO4	Down regulated
MISP	Down regulated
CCBE1	Down regulated
CADM1	Down regulated
RAP1GAP2	Down regulated
CLCN5	Down regulated
MYO10	Down regulated
MRPS6	Down regulated
KLF5	Down regulated
AC087379.2	Down regulated
GPRC5A	Down regulated
TEK	Down regulated
SCGB2A1	Down regulated
SLC43A2	Down regulated
HIF1A	Down regulated
COBL	Down regulated
HIBCH	Down regulated
PGM5	Down regulated
PROC	Down regulated
GPHN	Down regulated
CRABP1	Down regulated
SYNGR1	Down regulated
SLC38A4	Down regulated
SLC19A2	Down regulated
SDC4	Down regulated
NEDD4L	Down regulated
TREH	Down regulated
SEMA3B	Down regulated
AC093583.1	Down regulated
FGFR2	Down regulated
CPVL	Down regulated
ADAMTSL2	Down regulated
FUT3	Down regulated
SVEP1	Down regulated
G6PC	Down regulated
NFASC	Down regulated
KLK1	Down regulated
ETNK2	Down regulated
SH2D4A	Down regulated
FAM102A	Down regulated
LGR4	Down regulated
PLEKHA6	Down regulated
PFN2	Down regulated
AL135999.3	Down regulated
TLCD1	Down regulated
RERGL	Down regulated
ACAT1	Down regulated
SPINT1-AS1	Down regulated
FAM84B	Down regulated
EPHX2	Down regulated
LYNX1	Down regulated
PLG	Down regulated
PCSK1N	Down regulated
MT1F	Down regulated
ZNF710-AS1	Down regulated
FRAS1	Down regulated
FBLN1	Down regulated
ST14	Down regulated
CPEB4	Down regulated
ANGPTL3	Down regulated
ST3GAL4	Down regulated
ADH6	Down regulated
MFSD3	Down regulated
PI16	Down regulated
DSP	Down regulated
HYAL1	Down regulated
ASPDH	Down regulated
TLN2	Down regulated
LINC01503	Down regulated
HSPA8	Down regulated
PHYH	Down regulated
PHGDH	Down regulated
PCK1	Down regulated
ADRA2C	Down regulated
ACOX2	Down regulated
PIGR	Down regulated
GJB1	Down regulated
TUBB2A	Down regulated
KIT	Down regulated
AC015922.2	Down regulated
LARGE2	Down regulated
PIPOX	Down regulated
HOXB7	Down regulated
UST	Down regulated
CYCS	Down regulated
EPS8L1	Down regulated
AC064807.2	Down regulated
HOXD10	Down regulated
RAB29	Down regulated
PPL	Down regulated
C14orf132	Down regulated
INSYN1	Down regulated
TM7SF2	Down regulated
PCDH1	Down regulated
RASL11A	Down regulated
CRYL1	Down regulated
PLCG2	Down regulated
BTBD11	Down regulated
LAMC2	Down regulated
SOWAHB	Down regulated
CTF1	Down regulated
CEACAM1	Down regulated
LINC00924	Down regulated
RGN	Down regulated
PDZRN3	Down regulated
EVC	Down regulated
C1orf210	Down regulated
NCOA7	Down regulated
WWC1	Down regulated
DDAH1	Down regulated
CTGF	Down regulated
PRLR	Down regulated
MELTF	Down regulated
GPR155	Down regulated
PAH	Down regulated
SCAMP5	Down regulated
MATN2	Down regulated
CFAP126	Down regulated
MYO5B	Down regulated
ZNF204P	Down regulated
MEIS3P1	Down regulated
MTTP	Down regulated
APOD	Down regulated
BDKRB2	Down regulated
MTDHP3	Down regulated
NPY1R	Down regulated
CHDH	Down regulated
IRS1	Down regulated
PKHD1	Down regulated
LHFPL3-AS2	Down regulated
TMEM38A	Down regulated
RAB11FIP1	Down regulated
LDLR	Down regulated
CXCL12	Down regulated
ALDH1B1	Down regulated
SRP14P4	Down regulated
SDC1	Down regulated
APCDD1L	Down regulated
TOX	Down regulated
ATP9A	Down regulated
BEX4	Down regulated
PARM1	Down regulated
CA4	Down regulated
SLPI	Down regulated
RDH12	Down regulated
SORL1	Down regulated
GCAT	Down regulated
SCRN1	Down regulated
CYP1B1	Down regulated
SELP	Down regulated
TRIB1	Down regulated
LIX1	Down regulated
MEST	Down regulated
METTL7A	Down regulated
MACROD1	Down regulated
GLRB	Down regulated
WFDC2	Down regulated
S100A6	Down regulated
PC	Down regulated
CYP4F3	Down regulated
AHCYL2	Down regulated
SMTNL2	Down regulated
F3	Down regulated
HRASLS2	Down regulated
QPRT	Down regulated
KL	Down regulated
HAGLR	Down regulated
PAX8	Down regulated
FLRT3	Down regulated
UGT3A1	Down regulated
PROM1	Down regulated
LINC02294	Down regulated
SORCS2	Down regulated
TSPAN1	Down regulated
METRNL	Down regulated
CD82	Down regulated
CKB	Down regulated
FOXI2	Down regulated
MYL3	Down regulated
CLDN7	Down regulated
MUC13	Down regulated
CCDC8	Down regulated
TST	Down regulated
IGF2BP2	Down regulated
TNFRSF11B	Down regulated
FGL2	Down regulated
APOH	Down regulated
PODXL	Down regulated
SPOCK2	Down regulated
LUM	Down regulated
SPNS2	Down regulated
SHMT1	Down regulated
BEX2	Down regulated
RNF152	Down regulated
CXADR	Down regulated
GOLM1	Down regulated
SLIT2	Down regulated
KLHDC7A	Down regulated
CKMT2	Down regulated
LCN2	Down regulated
KCNJ15	Down regulated
CPN2	Down regulated
GDF15	Down regulated
GPC4	Down regulated
CLMP	Down regulated
SLC22A6	Down regulated
TBC1D14	Down regulated
MIR4664	Down regulated
EMCN	Down regulated
APOC3	Down regulated
ACSL1	Down regulated
CYP24A1	Down regulated
BEX5	Down regulated
CAPN6	Down regulated
TMEM125	Down regulated
ENPP5	Down regulated
CSDC2	Down regulated
GATM	Down regulated
NAPSA	Down regulated
IGFBP5	Down regulated
EMX2OS	Down regulated
SPINK1	Down regulated
CLDN4	Down regulated
COL14A1	Down regulated
ELF3	Down regulated
BCYRN1	Down regulated
HAO2	Down regulated
SCGB1D2	Down regulated
CLNK	Down regulated
FOLR1	Down regulated
PBLD	Down regulated
STUM	Down regulated
SLC16A12	Down regulated
AQP1	Down regulated
FOXQ1	Down regulated
GALNT17	Down regulated
DMKN	Down regulated
TMEM174	Down regulated
LINC01802	Down regulated
MXRA5	Down regulated
AGMAT	Down regulated
AKR7A3	Down regulated
MAOA	Down regulated
PKIA	Down regulated
PODXL2	Down regulated
PTGES	Down regulated
BEX1	Down regulated
PTGS2	Down regulated
SLC6A19	Down regulated
CYP8B1	Down regulated
SLC22A12	Down regulated
UPK1B	Down regulated
TIMP3	Down regulated
PRELP	Down regulated
MT1M	Down regulated
MFAP4	Down regulated
PHYHIPL	Down regulated
NR4A3	Down regulated
MT1E	Down regulated
MT-TL1	Down regulated
CYP4A22	Down regulated
MMP7	Down regulated
SPX	Down regulated
ALDH1L1	Down regulated
SCARA3	Down regulated
RAMP1	Down regulated
ABO	Down regulated
LTF	Down regulated
SMIM32	Down regulated
SMIM24	Down regulated
ATF3	Down regulated
SPOCK1	Down regulated
AOX1	Down regulated
EGR1	Down regulated
G0S2	Down regulated
FCAMR	Down regulated
MT1X	Down regulated
DES	Down regulated
STAC2	Down regulated
ALDH8A1	Down regulated
CRABP2	Down regulated
NR4A1	Down regulated
AZGP1	Down regulated
FOS	Down regulated
CYP4A11	Down regulated
MIOX	Down regulated
MIR3189	Down regulated
ISLR	Down regulated
SLC13A1	Down regulated
PRODH2	Down regulated
MME	Down regulated
RBP4	Down regulated
GPD1	Down regulated
SERPINA6	Down regulated
KRT19	Down regulated
DDC	Down regulated
CCL21	Down regulated
AOC1	Down regulated
CA9	Up regulated
SPAG4	Up regulated
NDUFA4L2	Up regulated
DDB2	Up regulated
NOL3	Up regulated
HILPDA	Up regulated
CXCR4	Up regulated
AC083855.2	Up regulated
SLC16A3	Up regulated
SAP30	Up regulated
STC2	Up regulated
ANGPTL4	Up regulated
VIM	Up regulated
SCARB1	Up regulated
TREM2	Up regulated
EGLN3	Up regulated
COLGALT1	Up regulated
COL23A1	Up regulated
NNMT	Up regulated
HK2	Up regulated
SLC1A4	Up regulated
FCGR3A	Up regulated
CAV2	Up regulated
TYMP	Up regulated
NETO2	Up regulated
SLC15A4	Up regulated
SCD	Up regulated
TYROBP	Up regulated
LAMA4	Up regulated
SLC16A1	Up regulated
RHBDF2	Up regulated
ESM1	Up regulated
TRPV2	Up regulated
ADM	Up regulated
ENO2	Up regulated
VEGFA	Up regulated
SHMT2	Up regulated
ARRB2	Up regulated
PSMB8	Up regulated
BHLHE41	Up regulated
CD40	Up regulated
HLA-F	Up regulated
MLKL	Up regulated
ODF3B	Up regulated
APOC1	Up regulated
LAPTM5	Up regulated
SEMA5B	Up regulated
FCER1G	Up regulated
IKBIP	Up regulated
PTPRE	Up regulated
TAPBP	Up regulated
EDA2R	Up regulated
C3	Up regulated
AC138207.5	Up regulated
LILRB1	Up regulated
RNF149	Up regulated
ZNF395	Up regulated
INHBB	Up regulated
ST8SIA4	Up regulated
MIR210HG	Up regulated
ENPP3	Up regulated
PRDM1	Up regulated
TRADD	Up regulated
HCLS1	Up regulated
PML	Up regulated
ADAP2	Up regulated
CD300A	Up regulated
CDCA2	Up regulated
WIPF1	Up regulated
CAV1	Up regulated
PRDX4	Up regulated
RGS19	Up regulated
C1QB	Up regulated
LCP2	Up regulated
TMCC1	Up regulated
LINC00887	Up regulated
TNFAIP6	Up regulated
IGFBP3	Up regulated
TNFRSF10B	Up regulated
FUT11	Up regulated
DGKD	Up regulated
PLK2	Up regulated
C1QC	Up regulated
COL5A3	Up regulated
YBX3	Up regulated
GMFG	Up regulated
LY86	Up regulated
PDLIM1	Up regulated
ITGB2	Up regulated
MYO1F	Up regulated
RASAL3	Up regulated
SPI1	Up regulated
LGALS9	Up regulated
FAM78A	Up regulated
ANGPT2	Up regulated
PSMB9	Up regulated
LPCAT1	Up regulated
ITGAX	Up regulated
ARHGDIB	Up regulated
RGS1	Up regulated
GPSM3	Up regulated
SELPLG	Up regulated
C1QA	Up regulated
DGCR9	Up regulated
HSF4	Up regulated
KRBA1	Up regulated
CD1D	Up regulated
PALD1	Up regulated
ARHGAP25	Up regulated
P4HA1	Up regulated
ARRDC2	Up regulated
PYGL	Up regulated
PHKA2	Up regulated
PPP1R18	Up regulated
MS4A7	Up regulated
AEN	Up regulated
STAMBPL1	Up regulated
TNFRSF14	Up regulated
HLA-B	Up regulated
C1orf162	Up regulated
FABP6	Up regulated
PIK3R5	Up regulated
LAIR1	Up regulated
PLOD3	Up regulated
IL4R	Up regulated
EHD2	Up regulated
IGSF6	Up regulated
PDK1	Up regulated
IFNGR2	Up regulated
GAL3ST4	Up regulated
TBXAS1	Up regulated
IL2RB	Up regulated
MYDGF	Up regulated
CASP1	Up regulated
MS4A6A	Up regulated
SLFN13	Up regulated
VWF	Up regulated
PFKP	Up regulated
LDHA	Up regulated
NEK6	Up regulated
RASSF2	Up regulated
HCK	Up regulated
HSPB8	Up regulated
LAT2	Up regulated
TYMS	Up regulated
THEMIS2	Up regulated
GAS2L3	Up regulated
PFKFB4	Up regulated
NKG7	Up regulated
PRF1	Up regulated
DOK3	Up regulated
SASH3	Up regulated
GABRD	Up regulated
ELMO1	Up regulated
BAX	Up regulated
CD70	Up regulated
LST1	Up regulated
HMOX1	Up regulated
CSPG4	Up regulated
APBB1IP	Up regulated
DEPP1	Up regulated
MYO9B	Up regulated
SH3BP2	Up regulated
FERMT3	Up regulated
PAG1	Up regulated
TAP1	Up regulated
CASP4	Up regulated
CORO1A	Up regulated
AC108463.1	Up regulated
LILRB2	Up regulated
ITGA5	Up regulated
TAF1D	Up regulated
BTN3A2	Up regulated
LGALS1	Up regulated
GRAMD1A	Up regulated
TMEM140	Up regulated
RUNX3	Up regulated
OLFML2B	Up regulated
TMEM91	Up regulated
BTN3A1	Up regulated
LOXL2	Up regulated
CCL5	Up regulated
NLRC5	Up regulated
SFXN3	Up regulated
SQOR	Up regulated
FMNL1	Up regulated
CD37	Up regulated
EVL	Up regulated
TNFRSF4	Up regulated
ANXA4	Up regulated
MCAM	Up regulated
IFI16	Up regulated
DGKZ	Up regulated
ERO1A	Up regulated
STX4	Up regulated
GGTA1P	Up regulated
SNX33	Up regulated
GBP2	Up regulated
CD300LF	Up regulated
GM2A	Up regulated
TMSB10	Up regulated
SIGLEC10	Up regulated
DPP9	Up regulated
GJC1	Up regulated
PARVG	Up regulated
EHBP1L1	Up regulated
INPP5D	Up regulated
ENSG00000286733	Up regulated
FCGR2A	Up regulated
ADORA3	Up regulated
RASD2	Up regulated
CHST11	Up regulated
TNFAIP8L2	Up regulated
STAC3	Up regulated
SDHAP3	Up regulated
HLA-A	Up regulated
HIF1A-AS2	Up regulated
GZMA	Up regulated
VASH1	Up regulated
BIN2	Up regulated
EFHD2	Up regulated
RASA3	Up regulated
PLXDC1	Up regulated
HLA-DPB1	Up regulated
IDO1	Up regulated
PTP4A3	Up regulated
TNFSF9	Up regulated
AC019069.1	Up regulated
GMIP	Up regulated
CLEC2B	Up regulated
LINC02188	Up regulated
WAS	Up regulated
MAP4K4	Up regulated
FKBP10	Up regulated
CD4	Up regulated
FXYD5	Up regulated
CARD16	Up regulated
BMP1	Up regulated
APOBEC3G	Up regulated
SLC37A2	Up regulated
DEF6	Up regulated
PSMB8-AS1	Up regulated
SERPINH1	Up regulated
OLFML2A	Up regulated
VAV1	Up regulated
TTYH3	Up regulated
APLN	Up regulated
RPS2	Up regulated
PHYKPL	Up regulated
MYOCOS	Up regulated
ABCC3	Up regulated
ARHGAP30	Up regulated
EMP3	Up regulated
CST7	Up regulated
RIN3	Up regulated
PLEKHO1	Up regulated
LSP1	Up regulated
PREX1	Up regulated
RN7SL138P	Up regulated
AC026369.2	Up regulated
APOBEC3C	Up regulated
BTK	Up regulated
IFFO1	Up regulated
EVI2B	Up regulated
CD2	Up regulated
LZTS1	Up regulated
GZMH	Up regulated
CD276	Up regulated
NPTX2	Up regulated
NFAM1	Up regulated
UBE2L6	Up regulated
AHNAK2	Up regulated
LHFPL2	Up regulated
PLIN2	Up regulated
RPS19	Up regulated
CYTH4	Up regulated
P2RX7	Up regulated
RASSF4	Up regulated
AL109615.3	Up regulated
PPP1R3C	Up regulated
NCKAP1L	Up regulated
DLL4	Up regulated
CD52	Up regulated
CDK18	Up regulated
TRPM2	Up regulated
IL10RA	Up regulated
CYP2J2	Up regulated
PNMA2	Up regulated
AC007406.3	Up regulated
CD247	Up regulated
HLA-H	Up regulated
LDLRAD3	Up regulated
E2F1	Up regulated
SCN1B	Up regulated
CEMIP2	Up regulated
AOAH	Up regulated
ITGAL	Up regulated
NXPH4	Up regulated
CSNK1E	Up regulated
RELB	Up regulated
CDKN2A	Up regulated
SLC6A3	Up regulated
P2RY1	Up regulated
DDIT4	Up regulated
CD86	Up regulated
GNLY	Up regulated
MSC	Up regulated
C4orf47	Up regulated
ABLIM3	Up regulated
OSCAR	Up regulated
LILRB4	Up regulated
PLEK	Up regulated
TRBC1	Up regulated
CD53	Up regulated
TGFB1	Up regulated
ACKR3	Up regulated
SIGLEC8	Up regulated
CSF3R	Up regulated
IL32	Up regulated
SERPINB9	Up regulated
CTSS	Up regulated
RAC2	Up regulated
CORO1C	Up regulated
LINC00462	Up regulated
C1QTNF6	Up regulated
CGREF1	Up regulated
KCNE3	Up regulated
POU5F1	Up regulated
FPR3	Up regulated
PLEKHG2	Up regulated
NCF4	Up regulated
LOX	Up regulated
TMC8	Up regulated
OAS1	Up regulated
PLXND1	Up regulated
LMBR1L	Up regulated
ABCG1	Up regulated
TRIB3	Up regulated
ASF1B	Up regulated
FAM49A	Up regulated
ISG20	Up regulated
BBC3	Up regulated
SDS	Up regulated
SAMHD1	Up regulated
ARHGEF6	Up regulated
SLFN11	Up regulated
JAK3	Up regulated
AC018553.1	Up regulated
TRBC2	Up regulated
AL731533.2	Up regulated
CMTM3	Up regulated
PCED1B-AS1	Up regulated
TNFRSF1B	Up regulated
HLA-DQB1	Up regulated
DOK2	Up regulated
GAL3ST1	Up regulated
CTSW	Up regulated
ITGAM	Up regulated
TTC21B-AS1	Up regulated
BARX2	Up regulated
EMILIN2	Up regulated
RNASET2	Up regulated
SMPDL3A	Up regulated
LCP1	Up regulated
CDKN2C	Up regulated
SIGLEC9	Up regulated
MILR1	Up regulated
HTATIP2	Up regulated
CLEC7A	Up regulated
PGF	Up regulated
ETV7	Up regulated
HPCAL1	Up regulated
GRB10	Up regulated
CAVIN3	Up regulated
ARHGAP9	Up regulated
FHOD1	Up regulated
LPXN	Up regulated
ARHGAP45	Up regulated
LTB4R	Up regulated
SLC2A1	Up regulated
EBI3	Up regulated
MYO1G	Up regulated
CD3D	Up regulated
MYO3A	Up regulated
GRIK3	Up regulated
CD200	Up regulated
LILRB3	Up regulated
GAS5	Up regulated
PROCR	Up regulated
RGS10	Up regulated
CDKN2B	Up regulated
RAB37	Up regulated
CXCL9	Up regulated
PDIA5	Up regulated
SEMA6A	Up regulated
NRP2	Up regulated
TNFSF13B	Up regulated
VSIR	Up regulated
CCL4	Up regulated
RNASE6	Up regulated
C3AR1	Up regulated
AXL	Up regulated
P4HB	Up regulated
STAB1	Up regulated
CCDC88B	Up regulated
NCF2	Up regulated
PLEKHO2	Up regulated
AL590666.2	Up regulated
CCND1	Up regulated
PLCB2	Up regulated
RPL17P50	Up regulated
CLEC2D	Up regulated
SNHG1	Up regulated
COL4A1	Up regulated
HLA-DMA	Up regulated
FAM57A	Up regulated
SPARC	Up regulated
HCP5	Up regulated
PXDC1	Up regulated
CXCL10	Up regulated
EIF4EBP1	Up regulated
AC091390.1	Up regulated
BNIP3	Up regulated
MNDA	Up regulated
TNFAIP3	Up regulated
PPP1R13L	Up regulated
SNHG12	Up regulated
BTN3A3	Up regulated
SEZ6L2	Up regulated
FBXO17	Up regulated
AL096799.1	Up regulated
SCARF1	Up regulated
KCNE4	Up regulated
AC079760.2	Up regulated
CD3E	Up regulated
ABCA1	Up regulated
FATE1	Up regulated
SLC15A3	Up regulated
ITGA4	Up regulated
SLC27A3	Up regulated
PLA2G16	Up regulated
POT1-AS1	Up regulated
CLK4	Up regulated
IL18BP	Up regulated
SLC2A3	Up regulated
MTCL1	Up regulated
TPX2	Up regulated
AKNA	Up regulated
SLC1A3	Up regulated
MS4A4A	Up regulated
RASSF5	Up regulated
TIMP1	Up regulated
COL6A2	Up regulated
HLA-DQA1	Up regulated
SH2B3	Up regulated
CCNA2	Up regulated
CDT1	Up regulated
FKBP11	Up regulated
CXorf36	Up regulated
AC009542.2	Up regulated
UNC5B	Up regulated
CCR5	Up regulated
CD84	Up regulated
TRIM22	Up regulated
PLA2G7	Up regulated
LPAR5	Up regulated
HSD3B7	Up regulated
AL021328.1	Up regulated
ENSG00000286025	Up regulated
MMP11	Up regulated
PILRA	Up regulated
C6orf223	Up regulated
IKZF1	Up regulated
GPR4	Up regulated
RAB42	Up regulated
EXOSC5	Up regulated
CYGB	Up regulated
CSTA	Up regulated
ASPHD1	Up regulated
EVI2A	Up regulated
HRH2	Up regulated
TSPAN4	Up regulated
AC040977.1	Up regulated
GZMB	Up regulated
HAPLN3	Up regulated
MYC	Up regulated
JAG2	Up regulated
DEGS1	Up regulated
MARCKS	Up regulated
CSF1R	Up regulated
SIGLEC1	Up regulated
PNCK	Up regulated
MICAL1	Up regulated
TCIRG1	Up regulated
PTP4A2P2	Up regulated
TAGAP	Up regulated
BIRC3	Up regulated
FCGR1A	Up regulated
AFAP1L1	Up regulated
TOP2A	Up regulated
COL5A2	Up regulated
FJX1	Up regulated
DIRAS2	Up regulated
ARID5A	Up regulated
DOCK2	Up regulated
MSR1	Up regulated
HK3	Up regulated
BATF	Up regulated
OSMR	Up regulated
IFI44	Up regulated
MMP14	Up regulated
PPP1R3B	Up regulated
AC147651.3	Up regulated
ADA	Up regulated
SLC43A3	Up regulated
TUBB6	Up regulated
METTL26	Up regulated
ANXA1	Up regulated
PTPRC	Up regulated
CAPN12	Up regulated
HES4	Up regulated
TMEM44	Up regulated
SLA2	Up regulated
ZAP70	Up regulated
PCED1B	Up regulated
IRF7	Up regulated
FDXR	Up regulated
IL15RA	Up regulated
LIMD2	Up regulated
ARHGAP42	Up regulated
TRIM9	Up regulated
CD14	Up regulated
FGR	Up regulated
SEL1L3	Up regulated
ABI3	Up regulated
SNHG15	Up regulated
HLA-DPA1	Up regulated
SIRPA	Up regulated
DLX5	Up regulated
CD8A	Up regulated
RNU6-796P	Up regulated
ENSG00000287733	Up regulated
P4HA2	Up regulated
HSPA7	Up regulated
SPN	Up regulated
LRRC25	Up regulated
COL8A1	Up regulated
GAS6-AS1	Up regulated
NT5DC3	Up regulated
OR51E1	Up regulated
GIMAP4	Up regulated
CTSZ	Up regulated
AC084880.1	Up regulated
CD96	Up regulated
RNU6-339P	Up regulated
ALOX5	Up regulated
PTTG1	Up regulated
HSPA6	Up regulated
COX4I2	Up regulated
CD6	Up regulated
CD48	Up regulated
MICALL2	Up regulated
TBC1D10C	Up regulated
SLA	Up regulated
GZMM	Up regulated
PHLDA3	Up regulated
DYSF	Up regulated
LINC01428	Up regulated
RUNX1	Up regulated
STMN3	Up regulated
ACLY	Up regulated
AC007326.1	Up regulated
AL162724.2	Up regulated
GJA1	Up regulated
AC107021.2	Up regulated
LMNB1	Up regulated
ATG16L2	Up regulated
SNX20	Up regulated
SLAMF6	Up regulated
GRAMD4	Up regulated
CD300C	Up regulated
PXDN	Up regulated
KIAA0895L	Up regulated
FABP7	Up regulated
SEMA6B	Up regulated
IL4I1	Up regulated
CD72	Up regulated
QRFPR	Up regulated
PSORS1C3	Up regulated
APOBR	Up regulated
LINC01871	Up regulated
PLOD2	Up regulated
COL4A2	Up regulated
FER1L4	Up regulated
RTP4	Up regulated
INF2	Up regulated
HLA-DQB2	Up regulated
PCDH17	Up regulated
PLOD1	Up regulated
KSR1	Up regulated
GUCY1B1	Up regulated
UBE2C	Up regulated
BTBD19	Up regulated
AC022509.2	Up regulated
DOC2A	Up regulated
EMB	Up regulated
TRIM14	Up regulated
HLA-G	Up regulated
FAM193B	Up regulated
SPATA18	Up regulated
NFKBIE	Up regulated
MAP3K7CL	Up regulated
TLR2	Up regulated
PYCARD	Up regulated
MAP4K1	Up regulated
PSTPIP1	Up regulated
GIMAP2	Up regulated
MAP3K14	Up regulated
AL365181.3	Up regulated
SLC29A4	Up regulated
PPFIA4	Up regulated
ADGRE5	Up regulated
PMEPA1	Up regulated
MIR210	Up regulated
AC073218.1	Up regulated
AP002884.1	Up regulated
OAS2	Up regulated
NMB	Up regulated
AP000439.2	Up regulated
ENSG00000287560	Up regulated
PSMB10	Up regulated
TMEM233	Up regulated
ANKZF1	Up regulated
ADAMTS4	Up regulated
CES4A	Up regulated
RIMKLA	Up regulated
STRA8	Up regulated
PCSK6	Up regulated
TRDC	Up regulated
PLD4	Up regulated
ALDOC	Up regulated
RGS5	Up regulated
AL117335.1	Up regulated
MEF2C	Up regulated
LINC01077	Up regulated
CD5	Up regulated
CXCR6	Up regulated
NFKB2	Up regulated
LINC01268	Up regulated
MAPK8IP3	Up regulated
GPR176	Up regulated
EBF2	Up regulated
EXOC3L1	Up regulated
ORAI3	Up regulated
CP	Up regulated
AC022144.1	Up regulated
SLC9A9	Up regulated
SLAMF7	Up regulated
MTMR11	Up regulated
CDH6	Up regulated
HHLA2	Up regulated
AC008760.2	Up regulated
FSCN1	Up regulated
ANO1	Up regulated
ICAM1	Up regulated
AC087468.1	Up regulated
KISS1R	Up regulated
NLGN1	Up regulated
CD7	Up regulated
GDF6	Up regulated
FABP5	Up regulated
INSR	Up regulated
AC023024.2	Up regulated
DNAH11	Up regulated
CD36	Up regulated
FCGR2C	Up regulated
FLT1	Up regulated
HAPLN1	Up regulated
EPB41L4A-AS1	Up regulated
CXCR3	Up regulated
BIRC5	Up regulated
LY96	Up regulated
ADAMTS10	Up regulated
NID1	Up regulated
RNA5SP18	Up regulated
CDCA7L	Up regulated
LINC01587	Up regulated
GBP5	Up regulated
SLC28A1	Up regulated
GLIPR1	Up regulated
ISG15	Up regulated
PGGHG	Up regulated
GPR183	Up regulated
ZNF37CP	Up regulated
CTHRC1	Up regulated
BCL2A1	Up regulated
KCCAT198	Up regulated
ALPK2	Up regulated
APOL2	Up regulated
MZT2A	Up regulated
LYZ	Up regulated
LBX2-AS1	Up regulated
COL1A1	Up regulated
GBP1	Up regulated
SH2D2A	Up regulated
CHST15	Up regulated
AC078864.1	Up regulated
MYBL2	Up regulated
TENM1	Up regulated
SIT1	Up regulated
BTBD16	Up regulated
LINC02041	Up regulated
TMEM45A	Up regulated
COL27A1	Up regulated
ZNF83	Up regulated
VAMP5	Up regulated
SLC39A14	Up regulated
RGCC	Up regulated
P2RY13	Up regulated
SLCO2B1	Up regulated
KLRB1	Up regulated
MYO15B	Up regulated
AL109615.2	Up regulated
TRBD1	Up regulated
NRP1	Up regulated
AHSA2P	Up regulated
AC156455.1	Up regulated
RGS14	Up regulated
ADAMTS2	Up regulated
LINC01738	Up regulated
SEMA3F	Up regulated
ZNF692	Up regulated
NPDC1	Up regulated
CD3G	Up regulated
LINGO1	Up regulated
NRARP	Up regulated
AVPR1B	Up regulated
HAVCR2	Up regulated
CXCL11	Up regulated
C4B	Up regulated
NOTCH4	Up regulated
FASLG	Up regulated
PDGFD	Up regulated
EXOC3L4	Up regulated
CYBA	Up regulated
LGI4	Up regulated
EGFR	Up regulated
TLR3	Up regulated
AC022509.1	Up regulated
GLIS1	Up regulated
CD248	Up regulated
KCNJ2	Up regulated
RPL22L1	Up regulated
MPEG1	Up regulated
IKZF3	Up regulated
GPR34	Up regulated
MET	Up regulated
CYBB	Up regulated
OR2I1P	Up regulated
AL109615.1	Up regulated
MIR155HG	Up regulated
CD27	Up regulated
C5AR1	Up regulated
SLC6A8	Up regulated
LCAT	Up regulated
LPAR6	Up regulated
HEYL	Up regulated
[truncated: 290 more rows]
