# Supplementary material
Source: Research Square preprint supplement (doi:10.21203/rs.3.rs-9129596/v1)
Supplement: Supplementary file 3 [file 80fb5a6f6ec1d53f6129423b.xlsx]

## Sheet: Tables S4
Tables S4. Stratification of ccRCC patients into low- and high-risk groups based on the median FMRG score
id	futime	fustat	ERBB2	PDGFRA	CDKN2A	VIM	FASLG	NGF	SHMT1	SHMT2	ABCB1	TIMP3	riskScore	risk
TCGA-CW-5584	0.449315	1	16.7635	0.3251	1.1724	402.435	0.4529	6.6448	31.2833	81.009	21.8907	286.018	0.444449	low
TCGA-BP-5195	2.05205	0	9.539	0.6949	1.7496	409.973	0.9301	6.3507	23.0833	30.2147	9.7364	315.027	0.516251	low
TCGA-AK-3455	1.87123	1	10.8215	0.1743	0.9458	332.255	5.2365	3.8816	29.4544	88.5384	13.9478	214.467	0.895309	low
TCGA-BP-4347	3.74521	0	8.8044	0.3426	0.9201	385.479	1.0669	11.1349	15.2052	48.3933	7.3121	480.824	0.35917	low
TCGA-B0-5703	6.15342	0	16.2226	0.1386	2.94	321.739	1.6974	11.2686	34.4284	86.5087	17.9233	86.4253	1.33859	high
TCGA-AK-3436	9.12603	0	6.7309	0.4383	3.6609	872.241	0.5689	2.0894	14.9253	140.387	9.3823	93.8994	2.49473	high
TCGA-B0-4700	5.42466	1	5.3333	4.7549	2.9018	841.218	6.6955	10.3631	8.8982	37.4617	1.9866	149.941	2.15512	high
TCGA-BP-4973	3.79178	0	10.5942	0.0354	1.5953	363.141	1.2867	6.722	28.9965	55.7033	10.6577	209.374	0.823607	low
TCGA-B4-5836	0.386301	0	12.232	0.3456	1.4474	280.617	1.1075	3.8696	32.5735	39.2324	7.2302	434.046	0.294974	low
TCGA-CJ-4888	4.29315	1	4.298	1.5193	1.076	283.385	4.3507	3.3996	11.0391	46.3441	1.8817	90.2789	2.14803	high
TCGA-B0-5695	5.89041	0	21.611	0.2948	1.4212	374.002	0.9543	7.6431	32.0135	31.9075	8.923	488.243	0.202239	low
TCGA-BP-4989	0.323288	0	5.8422	1.6482	6.5251	288.211	13.1291	7.0902	10.4282	25.266	1.638	150.588	2.40106	high
TCGA-A3-A8OW	0.884932	0	18.8686	0.0942	1.2413	253.12	1.4313	6.3626	27.848	41.6089	8.2754	347.554	0.409525	low
TCGA-CJ-4893	2.05479	0	10.5331	0.1035	1.7171	171.398	1.7764	10.8279	21.9017	42.7915	6.4243	241.932	0.896952	low
TCGA-B0-5108	4.88219	0	6.3029	2.6807	0.2709	456.02	1.647	6.4588	12.8578	54.4621	1.7137	139.992	1.71691	high
TCGA-CZ-5984	5.66301	0	16.9185	0.1883	1.4763	546.895	1.3579	2.9852	24.3908	56.4697	8.7657	58.9641	1.40511	high
TCGA-CJ-4871	6.63836	0	5.3627	1.8325	2.2977	420.913	0.9807	5.4948	19.3004	62.997	6.7593	157.938	1.42831	high
TCGA-CJ-4643	4.91233	0	10.8687	0.5767	0.8545	290.428	0.7856	21.1751	16.7792	37.2824	7.5518	346.695	0.670307	low
TCGA-A3-3382	1.5726	0	10.1699	0.1205	1.8937	496.162	0.78	0.9787	14.6204	60.3645	13.065	89.3568	1.33526	high
TCGA-DV-5574	5.52329	0	8.9196	2.7776	1.0331	421.89	1.618	4.8245	11.2238	19.4	4.0538	288.532	0.714239	low
TCGA-CJ-4900	4.69589	1	7.6438	0.6775	2.0996	396.801	4.6053	11.8752	16.6294	47.9544	1.2984	114.401	2.15709	high
TCGA-B0-4690	0.117808	1	7.7411	4.6835	0.181	396.369	3.6707	5.1596	13.6777	72.9489	1.3631	51.1094	2.83073	high
TCGA-CZ-5985	5.47123	0	21.8849	0.3951	0.8299	237.033	1.5629	1.5352	29.4638	40.7916	9.3979	94.5988	0.942578	low
TCGA-BP-4991	3.87123	0	12.8865	0.1308	0.5272	296.885	0.8441	9.1474	14.3769	50.8567	5.4605	237.006	0.919654	low
TCGA-CJ-4908	4.19452	0	9.1935	1.5864	1.1915	302.601	0.9627	9.3125	14.9064	41.9139	2.5799	293.994	0.834595	low
TCGA-B0-4714	0.271233	1	12.8183	0.4865	1.3041	435.188	9.7002	31.0709	18.4226	42.5855	3.5965	178.044	2.18723	high
TCGA-BP-4972	4.11507	0	13.7157	1.6487	1.1071	295.386	1.2421	8.8047	23.2585	56.7622	4.4834	251.783	0.873292	low
TCGA-CZ-5469	2.59178	1	22.4155	0.1282	0.873	847.559	0.3449	2.918	19.5034	69.1228	4.8637	33.6599	1.6744	high
TCGA-A3-A8OV	0.931507	0	22.5616	0.1322	0.969	234.542	0.651	9.0056	39.0558	56.9552	5.6925	125.9	1.01294	low
TCGA-BP-4758	6.04932	0	19.6247	0.2702	2.9192	651.113	3.9379	21.5647	15.0545	36.6735	3.0261	426.681	0.554103	low
TCGA-BP-4177	4.57534	0	42.8188	3.2019	0.7629	338.745	0.2291	4.6995	17.9556	21.4717	2.7798	349.519	0.315236	low
TCGA-BP-5184	3.10411	0	16.5173	6.1332	0.5597	368.462	1.029	6.0208	36.1347	56.3771	7.534	615.107	0.155524	low
TCGA-AK-3456	3.13151	0	21.8524	0.0206	0.5431	236.209	0.2311	0.2549	18.6438	18.5553	15.9382	66.0443	0.819996	low
TCGA-CZ-5989	5.21918	0	2.0784	0.1976	0.4731	399.659	3.3897	0.8794	8.5595	11.2861	25.7579	265.669	0.439528	low
TCGA-B0-5109	1.60822	1	17.3394	5.2704	0.3616	587.071	3.3489	2.5431	10.4449	44.0846	2.9994	89.6615	1.6883	high
TCGA-A3-3335	5.16712	0	2.9005	0.1354	1.8168	551.877	0.3524	6.6794	33.3905	92.3438	6.0416	56.5814	2.21206	high
TCGA-B8-5552	2.86575	0	15.9593	2.7561	0.7938	223.789	1.275	7.5848	15.6121	26.1876	7.9077	430.841	0.338359	low
TCGA-CZ-4861	1.22192	1	9.1451	0.4023	1.4033	598.974	1.4427	3.4712	16.89	80.4678	6.5639	53.7879	2.11768	high
TCGA-B0-5402	3.53425	0	8.5899	0.9234	1.056	375.811	1.4266	1.7508	30.5328	80.984	25.6914	311.691	0.388618	low
TCGA-B0-4821	3.36986	1	9.4903	0.4145	4.4548	840.489	1.8912	19.8976	15.2206	125.275	2.5765	43.4848	4.82198	high
TCGA-CZ-4866	8.95068	0	10.8508	0.1062	1.0136	350.408	0.3287	1.5038	55.4368	55.3288	8.7336	79.6186	0.971445	low
TCGA-CJ-4882	5.1589	0	11.1797	4.3916	3.9682	559.252	1.8315	40.4008	9.6875	49.1614	1.6977	150.712	3.46503	high
TCGA-AK-3440	7.84932	0	18.9236	0.066	1.822	20.0352	0.0361	1.0528	1.6044	21.1694	0.0676	89.8143	1.51246	high
TCGA-CZ-4858	5.76712	1	2.8922	15.3874	20.3545	786.395	4.5154	0.5195	4.196	46.653	1.0861	160.603	4.342	high
TCGA-BP-5191	2.64932	0	10.4274	0.0191	3.8795	883.161	3.7808	6.9196	22.2392	58.8736	18.1902	104.052	1.27923	high
TCGA-B2-4102	2.60822	0	17.8266	0.1119	0.5454	259.454	2.0232	4.4444	23.3036	24.2968	15.4822	310.745	0.364085	low
TCGA-B0-5690	9.29315	0	11.293	0.0426	3.1074	401.702	0.7407	15.5019	17.6262	45.1266	5.4463	229.797	1.11926	high
TCGA-BP-5181	4.09589	0	27.1486	0.4418	1.3702	435.332	0.4184	6.2675	39.8752	78.6327	1.4685	322.082	0.50557	low
TCGA-CZ-5465	7.02466	1	8.8799	0.0116	1.3637	629.344	0.3873	4.311	25.5303	121.62	11.5995	197.66	1.16755	high
TCGA-BP-4337	0.00547945	1	11.9629	6.142	1.6888	452.502	0.4065	15.3221	19.077	65.7273	0.6049	117.302	2.29373	high
TCGA-CJ-4886	5.34795	0	10.7885	1.3935	1.0369	309.974	2.8152	15.2943	21.8761	35.2257	5.3316	280.003	0.839223	low
TCGA-A3-3328	3.79452	0	52.8696	0.4334	0.213	13.7741	0.1274	0.0796	3.2331	6.4546	0.2219	95.6539	0.747578	low
TCGA-B0-5712	7.45753	0	31.1452	0.0692	2.5	278.822	0.5391	2.7024	39.5194	57.4915	4.2227	206.423	0.619144	low
TCGA-B2-5633	2.63836	0	10.9804	0.292567	0.4043	236.945	1.335	3.72487	13.9579	39.9332	8.74117	135.127	1.13648	high
TCGA-BP-4995	3.75616	0	19.9143	0.2168	1.2476	181.702	1.1469	3.1803	13.7721	83.125	0.8059	249.919	0.983675	low
TCGA-BP-5169	0.528767	0	5.0917	0.9821	3.1473	590.232	3.2291	2.9894	20.6783	81.6126	3.7635	61.7958	2.52995	high
TCGA-CZ-5454	1.97808	1	12.423	0.0908	1.4709	688.932	0.5127	2.76	18.1789	56.5384	1.7934	103.012	1.5525	high
TCGA-B0-5116	3.49041	0	11.0049	0.1514	1.0846	802.482	0.8125	16.22	32.2009	94.6925	13.1289	127.654	1.46121	high
TCGA-CZ-5463	1.8137	0	38.8766	0.0142	0.2651	338.932	1.4007	2.5944	22.1012	56.2355	20.5307	117.459	0.572172	low
TCGA-BP-5185	3.10137	0	20.8488	0.7285	3.7795	970.861	1.1507	15.4312	26.0643	54.328	12.079	201.462	0.900244	low
TCGA-BP-4327	0.29863	1	17.4307	0.1392	1.0856	377.943	0.8762	8.3987	23.3037	89.9869	4.9683	240.982	0.96883	low
TCGA-DV-A4W0	6.76712	0	15.457	0.4004	3.7953	270.512	0.3656	4.3145	17.001	51.4849	1.3145	252.511	0.922172	low
TCGA-B0-5705	12.4301	0	22.4784	0.0535	1.394	315.462	1.4962	7.975	35.272	68.7187	19.6188	307.839	0.377099	low
TCGA-B8-A7U6	1.35616	0	10.3877	0.3001	3.5	408.492	0.3445	8.7768	16.6851	42.4739	3.157	384.66	0.56684	low
TCGA-B8-5546	1.38356	0	34.1279	0.1253	0.1871	70.5979	0.1299	0.2234	15.0746	29.7703	10.2181	50.6141	0.920019	low
TCGA-CW-6088	8.8274	0	19.7728	1.5109	0.7617	257.121	0.5514	5.147	25.1507	43.2971	10.2612	628.387	0.122714	low
TCGA-CZ-5470	1.05753	0	11.7162	0.2093	2.6171	402.454	3.0775	5.2594	37.5436	58.9909	8.9304	144.706	1.0856	high
TCGA-BP-4759	6.49863	0	4.8953	0.4246	2.0461	1719.86	0.9159	6.2352	20.0339	107.843	4.5632	193.75	1.532	high
TCGA-BP-5196	2.78904	0	8.4661	2.4355	3.2734	764.849	3.5505	13.837	6.0486	48.2275	4.3005	136.06	2.1543	high
TCGA-B0-4712	3.66301	1	2.7549	2.6887	5.5021	849.065	2.4656	4.3397	10.5084	89.9523	2.6145	85.5126	3.17575	high
TCGA-BP-5007	3.12329	0	13.6835	0.2774	2.0408	481.464	1.2992	4.323	26.6247	55.8232	10.2168	303.801	0.538407	low
TCGA-B0-5699	10.5233	0	26.1455	0.0637	0.912	414.327	0.7217	3.4435	37.5008	75.2136	17.3735	207.635	0.506508	low
TCGA-BP-4340	1.53973	1	20.417	0.1569	0.7194	333.207	0.87	10.815	23.6286	58.7658	10.0956	197.753	0.843285	low
TCGA-B4-5843	0.030137	0	14.5203	1.1254	0.6582	397.564	0.2087	2.42	21.3288	33.9309	6.26	341.747	0.431408	low
TCGA-A3-3316	4.09041	0	2.1682	2.674	2.8926	440.239	0.5938	5.8772	15.8002	39.9342	5.4267	160.382	1.45464	high
TCGA-B8-A54I	0.410959	0	7.2469	0.2893	6.4069	339.284	1.5133	3.3216	13.8725	58.6693	3.7468	72.1051	2.41006	high
TCGA-BP-4960	5.95068	0	4.7573	0.6232	2.8671	499.713	0.9494	48.6724	18.4624	38.9038	7.0638	102.326	3.61361	high
TCGA-CW-6097	1.56438	1	10.2494	4.668	1.5407	396.471	0.8099	7.3886	7.9061	24.4692	3.3529	172.297	1.32072	high
TCGA-CJ-4641	4.55068	1	13.0822	2.7357	1.8246	245.812	4.004	7.9032	20.8886	40.2355	4.8068	88.9809	1.74891	high
TCGA-MM-A563	1.61918	0	16.791	4.1104	2.3405	372.325	0.8584	8.1146	11.5537	58.6642	3.2629	184.376	1.3695	high
TCGA-CZ-4860	0.564384	1	6.5623	4.9119	0.1674	852.424	0.6225	0.9216	4.9354	94.8325	0.485	16.663	3.5039	high
TCGA-AK-3427	9.81644	0	30.3727	0.9305	0.8879	26.0796	0.0338	3.8852	3.1109	35.2863	0.1569	72.6938	1.49906	high
TCGA-A3-3359	6.86027	0	16.608	0.1195	1.3909	197.946	2.5405	8.1082	22.7823	37.6423	6.8991	281.891	0.632352	low
TCGA-CZ-4859	4.89589	0	9.0074	0.0189	0.9939	131.289	0.3137	3.109	32.3069	51.8643	1.8859	337.723	0.537646	low
TCGA-A3-3308	0.0438356	0	5.074	1.7752	1.4731	360.795	0.4407	5.2037	33.0099	50.6125	3.1552	149.663	1.26923	high
TCGA-CZ-5456	6.63562	0	10.9441	1.1791	2.2239	425.815	1.3432	3.3487	16.0288	97.143	23.9498	34.5671	1.6392	high
TCGA-A3-3307	3.93425	0	12.2622	0.1221	1.0387	271.213	1.3166	4.6586	22.7675	51.7377	7.4255	217.075	0.836291	low
TCGA-BP-5004	3.08493	0	18.0743	0.5478	0.6077	424.479	0.4782	2.8354	22.9237	55.1888	5.8724	172.058	0.908005	low
TCGA-BP-4351	2.65753	0	8.8701	0.55	4.5767	578.088	0.4967	19.0719	30.7466	51.3962	0.9938	191.144	1.55564	high
TCGA-CJ-4640	9.53425	0	15.8492	0.8967	1.9552	211.381	3.4449	10.1705	11.1209	18.4359	19.9788	88.7706	1.11122	high
TCGA-B0-4813	0.0493151	1	27.1323	0.7729	6.9764	1047.04	0.3057	9.4342	5.7258	27.8068	0.2524	66.6622	1.99726	high
TCGA-CJ-4881	5.51781	0	8.4541	2.3149	4.8946	507.5	2.0508	10.6451	11.9446	38.8044	6.8724	68.9351	2.30341	high
TCGA-BP-4777	4.74247	0	8.5531	0.75	1.1737	230.32	5.0316	4.3068	25.0662	51.7878	8.9429	206.504	0.960173	low
TCGA-B0-4945	5.87671	1	12.661	0.572	0.5411	302.07	0.8044	8.9685	15.2418	28.1596	12.1446	313.76	0.50036	low
TCGA-BP-5168	4.00822	1	18.1439	0.0186	2.3416	285.893	0.9711	18.749	23.1902	81.2757	0.501	223.923	1.41266	high
TCGA-AK-3460	6.87123	0	12.61	0.5479	0.9345	404.689	0.8182	5.1146	25.3926	68.5843	7.1146	371.623	0.475094	low
TCGA-B0-4828	0.841096	1	16.9723	0.1237	1.5648	352.763	1.676	12.6719	36.1315	108.612	13.1359	67.1109	1.75122	high
TCGA-CZ-5460	7.87123	0	6.5421	0.0109	2.0078	558.847	1.3408	9.3463	18.8699	136.582	13.1845	161.299	1.80324	high
TCGA-CJ-4903	4.27397	0	14.7669	1.1317	2.2087	399.276	1.7317	8.431	24.821	51.6507	15.5775	269.669	0.591022	low
TCGA-B0-5096	0.186301	1	2.362	1.0895	1.2131	224.66	0.6431	1.0654	3.6638	37.9195	1.3521	55.7972	2.31971	high
TCGA-AK-3465	1.01096	0	8.6743	2.1104	0.2203	49.6512	0.0925	0.7954	5.9329	13.4765	3.4364	341.342	0.522654	low
TCGA-BP-4807	0.578082	0	19.5655	1.8868	0.9273	220.936	0.6151	4.5906	28.2449	68.9089	9.1736	189.802	0.840702	low
TCGA-B0-4824	4.53973	1	14.2659	0.6312	1.2256	207.969	6.4989	9.963	31.7452	40.5702	6.5958	249.29	0.800797	low
TCGA-A3-3378	1.72603	0	7.1168	0.2392	1.8617	231.061	1.8178	0.926	26.9011	28.3478	0.6182	54.7253	1.72037	high
TCGA-CJ-6028	4.45205	1	6.9991	0.811	0.6466	509.079	5.1244	3.0649	15.3166	39.5347	1.5185	86.8081	1.89851	high
TCGA-B8-4620	2.12877	0	3.5175	7.7537	1.5909	530.878	0.6257	14.3293	7.953	64.7274	0.793	77.4856	3.41961	high
TCGA-BP-5010	2.40548	1	7.6551	4.7372	1.7064	554.532	1.7609	29.7211	14.1899	34.2137	3.0356	154.637	2.31336	high
TCGA-BP-4976	4.47123	0	24.5759	0.0514	0.4371	316.757	0.4599	2.7115	36.0219	33.662	11.9742	313.206	0.305325	low
TCGA-B0-4698	0.115068	1	10.278	1.7169	80.5941	713.309	3.6565	0.3353	2.9002	15.8031	0.9336	32.0066	37.4032	high
TCGA-BP-4325	8.12055	0	15.2212	0.1282	0.7732	206.64	5.5065	1.6055	38.1815	44.6256	17.3189	187.662	0.595897	low
TCGA-CZ-5462	0.852055	1	14.9589	0.0733	2.1575	232.539	1.1715	0.8034	35.3327	51.1266	14.0517	86.4233	0.973822	low
TCGA-AK-3447	3.33425	0	10.7587	0.0674	3.1078	18.6901	0.0822	0.2142	1.502	27.5111	0.2389	197.395	1.17669	high
TCGA-B0-4836	3.39178	1	6.2917	2.1325	2.5879	729.439	1.6807	3.343	26.3498	44.1985	7.2812	112.866	1.37415	high
TCGA-B0-5692	10.8055	0	19.0593	0.2409	1.6398	419.851	10.7572	2.8547	21.3146	68.7888	1.8889	105.493	1.87981	high
TCGA-B0-5102	7.5726	1	15.4953	0.1363	1.5239	780.774	1.1374	3.6977	30.2147	62.1104	5.4915	127.008	1.15165	high
TCGA-B0-4823	1.24384	1	14.3442	2.3403	0.7761	480.522	0.9234	12.4206	19.2735	97.0874	6.3604	309.405	0.889494	low
TCGA-A3-A6NI	2.78904	0	19.5697	0.5407	1.0104	401.763	0.7845	4.9968	25.9287	66.03	8.4872	130.801	1.07562	high
TCGA-BP-5009	2.99178	1	7.5349	0.129	4.01	362.417	3.2918	9.8024	18.9484	69.6272	14.5749	121.65	1.61226	high
TCGA-B0-5698	9.94795	0	11.3216	0.0212	0.5155	425.804	1.4359	4.6045	31.0085	49.8703	3.8314	284.241	0.630081	low
TCGA-A3-3343	2.58904	0	14.6524	0.0112	0.9019	426.515	0.8221	2.0277	29.6831	28.5256	13.0199	140.385	0.726518	low
TCGA-3Z-A93Z	1.05479	0	16.7426	1.1674	1.5611	286.477	0.6509	11.739	14.4832	114.939	7.2732	235.52	1.29981	high
TCGA-BP-4804	3.99726	0	11.8364	1.6745	2.3304	392.56	3.8412	9.8973	14.7598	37.5782	4.5683	201.703	1.22052	high
TCGA-A3-3322	4.04932	0	18.634	1.7335	0.4278	266.612	0.7392	9.3633	23.6847	43.1716	5.2925	189.338	0.925172	low
TCGA-DV-A4VX	4.45479	1	13.7119	0.0988	5.537	395.653	1.028	7.5151	17.8388	96.8058	6.9588	17.8966	3.04971	high
TCGA-BP-5183	3.53699	0	20.5433	0.0239	0.8091	357.899	2.6881	1.5778	33.7916	76.6413	0.7697	183.402	0.989469	low
TCGA-CJ-4902	4.16438	0	8.2527	2.3658	1.0593	677.052	2.1284	13.3523	15.9534	32.8042	3.9832	145.341	1.55137	high
TCGA-A3-3329	4.44932	0	15.4839	0.0704	0.8295	421.345	1.0406	9.3634	24.3275	78.421	10.1965	143.266	1.21667	high
TCGA-CJ-4874	6.25479	0	12.9368	0.1904	2.1104	303.461	3.5969	5.1233	35.6549	57.778	5.9127	302.199	0.613198	low
TCGA-BP-5190	2.76986	0	32.8089	0.2826	1.9884	336.337	0.8176	2.4956	57.4685	67.1231	32.3371	127.559	0.347336	low
TCGA-DV-5565	3.6411	0	7.4545	0.921	3.4834	734.375	0.5709	7.2561	3.6292	46.5045	1.9896	361.958	0.758313	low
TCGA-BP-4335	1.30137	1	6.3655	0.8134	6.1079	558.737	2.2611	15.5416	18.235	55.9857	4.8704	287.811	1.18714	high
TCGA-BP-4982	2.77808	0	18.8564	0.9722	1.1153	243.355	1.3921	11.8874	24.1623	31.3682	6.4618	329.17	0.510847	low
TCGA-CZ-5458	7.6411	0	17.6012	0.1506	1.0402	352.037	0.7345	7.1775	31.3845	34.6211	16.4407	210.645	0.540709	low
TCGA-CJ-4635	3.87945	0	9.8612	0.4366	2.1203	294.745	6.3645	4.146	24.3279	34.6511	15.7054	140.942	0.999262	low
TCGA-BP-4975	3.92603	0	17.745	0.8581	0.4397	380.904	0.7461	9.1338	37.8088	97.4783	7.9845	270.736	0.712441	low
TCGA-CZ-4862	8.96164	0	14.4512	0.4167	0.7709	169.014	6.4429	4.5234	14.0089	24.6306	15.6785	166.03	0.855195	low
TCGA-BP-4765	5.98356	0	10.4655	3.2442	0.5557	274.102	0.4886	14.7177	22.1441	47.2234	0.7103	488.741	0.413097	low
TCGA-AK-3443	3.89863	0	29.6743	0.1887	0.2656	12.1525	0.0091	0.553	1.4147	7.8814	0.1581	130.657	0.950778	low
TCGA-EU-5904	1.50959	0	13.7125	0.564	1.5841	359.577	0.3667	11.5703	18.9537	39.7651	8.3543	445.572	0.35156	low
TCGA-A3-3306	3.06849	0	12.611	0.0165	1.1886	471.793	0.5378	0.3862	33.1909	52.5298	13.6248	106.903	0.900938	low
TCGA-B0-4818	1.39726	1	15.5964	0.0649	2.3708	238.551	1.0855	18.3562	29.4799	52.1841	6.7253	494.676	0.3339	low
TCGA-CW-6093	8.61918	0	12.8572	0.4641	0.8768	261.093	0.83	5.2291	21.6301	56.35	6.9884	287.611	0.652844	low
TCGA-B0-4819	0.50137	1	8.7276	3.1602	2.6923	315.731	7.6014	13.2178	8.3871	32.699	7.0678	93.4344	2.35545	high
TCGA-B0-4844	0.857534	1	12.4394	0.3134	2.361	650.276	1.8294	2.5657	42.5846	79.4204	14.1643	83.3861	1.15379	high
TCGA-B0-5120	3.20274	0	12.437	4.1097	1.7312	352.989	0.9083	17.4044	22.0948	49.3386	4.0846	517.923	0.370871	low
TCGA-BP-4766	4.00548	0	14.0648	0.0565	0.6089	155.022	0.5518	7.9165	41.9396	50.53	13.0941	278.889	0.463296	low
TCGA-BP-4962	4.89041	0	16.0628	5.3237	2.1884	307.883	2.9413	4.0822	24.8983	53.5703	11.7037	145.619	1.10036	high
TCGA-BP-5000	1.54247	0	12.3875	0.7646	2.5762	784.675	2.0468	14.5395	19.0758	77.6318	6.0946	204.031	1.39623	high
TCGA-B0-4827	2.42466	1	11.3634	2.1463	1.5632	377.721	1.1124	10.1885	45.1886	52.7727	0.6612	91.3316	1.57815	high
TCGA-MM-A84U	1.91781	0	19.2344	1.9611	3.483	404.493	1.3673	7.0735	17.0573	56.8962	6.1842	191.176	1.10662	high
TCGA-B0-5095	0.671233	1	10.06	9.2064	1.1893	535.497	2.1958	17.3888	9.0481	46.805	0.7291	242.156	1.59227	high
TCGA-B8-A54K	1.28493	0	52.1875	0.3278	2.1481	249.419	0.0708	3.4099	6.4939	39.2999	0.2188	264.32	0.495669	low
TCGA-CJ-4872	3.93151	0	5.8355	4.3749	2.645	844.218	1.6043	18.5252	12.7131	58.3712	4.9695	370.988	0.88442	low
TCGA-B0-4816	3.75616	1	11.113	0.172	2.268	339.172	0.9012	3.7818	22.5775	50.3456	6.3138	131.384	1.2524	high
TCGA-DV-5576	1.99178	1	35.9687	0.7424	0.6667	197.202	0.0388	16.1525	12.4366	26.0839	2.2592	295.813	0.567388	low
TCGA-A3-3370	6.23014	0	14.5981	1.6511	0.6118	195.103	3.0315	4.4323	19.5309	41.5645	8.1851	246.494	0.724537	low
TCGA-MM-A564	1.66301	0	8.8583	0.703	4.0825	873.607	0.912	22.6125	10.1264	60.4263	0.2563	121.678	2.84853	high
TCGA-G6-A8L7	5.84384	0	3.7309	0.0434	7.9906	1189.54	0.8901	4.8909	9.6448	54.7602	0.581	32.6265	3.40421	high
TCGA-CJ-4901	3.9726	0	5.3449	0.6097	3.3071	305.359	5.3863	11.8892	13.7054	49.5884	20.5167	63.3402	1.84833	high
TCGA-BP-5192	1.95616	0	23.6291	0.0183	0.5942	249.587	0.2381	11.0129	34.2251	49.9159	8.5871	222.687	0.638283	low
TCGA-B0-5080	0.936986	1	8.585	9.5241	1.7567	510.395	0.8102	16.697	5.9401	35.0203	2.7236	211.793	1.6609	high
TCGA-G6-A8L8	2.98904	1	25.4348	0.0292	4.017	434.591	0.4381	4.853	13.9752	73.917	7.8806	264.236	0.745053	low
TCGA-AK-3433	9.33973	0	28.5373	0.1713	2.5989	23.4141	0.1917	0.354	0.9979	10.5554	0.2841	162.099	0.939927	low
TCGA-BP-4965	5.12603	0	15.1041	0.2379	1.6717	238.35	0.6414	7.8282	22.7553	47.6134	13.9056	404.457	0.332133	low
TCGA-CJ-4897	9.15342	0	17.2246	0.8264	0.4912	436.208	0.9083	13.928	27.435	48.5322	11.8687	391.753	0.372088	low
TCGA-BP-4343	5.23836	1	3.6858	7.0838	1.2693	411.27	1.8633	8.1062	11.8416	44.3067	10.9378	88.0572	1.94133	high
TCGA-A3-A8OX	8.21918e-06	0	14.278	3.5572	1.6278	272.076	1.0391	7.8898	23.5359	33.6781	7.3559	181.737	0.972066	low
TCGA-B0-4822	3.04384	1	7.0476	0.6805	2.2635	1208.16	2.2434	21.1928	9.0604	34.4376	5.7408	94.0697	2.31185	high
TCGA-CZ-5459	4.61096	0	11.3713	0.2706	0.8595	552.061	0.9588	5.1914	32.3587	103.024	7.0937	150.828	1.31967	high
TCGA-BP-4334	1.76712	1	20.6832	0.2235	0.325	41.2004	0.1447	0.7916	1.0345	14.7057	0.1763	208.053	0.835966	low
TCGA-A3-3324	3.24932	0	16.3665	0.1886	1.7493	417.401	2.2215	6.1342	14.9649	31.228	7.2861	113.005	1.24968	high
TCGA-AK-3450	4.13151	0	10.4504	0.2975	1.4671	313.805	0.3752	4.3646	38.4422	25.6717	6.0133	285.96	0.495463	low
TCGA-A3-A6NN	0.00821918	0	24.7262	0.68	2.4704	220.129	1.4407	6.4304	26.8585	59.885	9.0774	221.117	0.724159	low
TCGA-B8-5551	0.0438356	0	7.3157	0.449	2.4273	411.335	5.3217	1.0848	9.0509	46.6572	2.2488	25.0222	2.7114	high
TCGA-CJ-5686	5.58356	0	14.1251	0.4074	0.4076	362.822	1.0903	3.6607	33.6343	25.5266	21.1662	127.22	0.609452	low
TCGA-CJ-4869	6.99726	0	13.2549	0.2509	2.6902	462.814	4.7706	26.4847	21.8889	47.1224	2.36	135.11	2.24747	high
TCGA-B8-A54J	1.44658	0	13.636	0.5887	2.6429	302.199	1.5061	8.9217	25.3032	48.7445	4.5391	592.972	0.214251	low
TCGA-A3-3349	3.79452	0	11.4898	2.1609	0.6911	454.359	1.3015	9.1272	20.0857	46.7824	3.1908	347.743	0.615771	low
TCGA-B0-4848	2.41918	1	10.1651	2.3149	2.1553	349.441	1.4766	9.2713	26.2626	91.0598	7.6211	120.966	1.794	high
TCGA-B0-5694	1.31507	1	22.2999	0.5142	1.3898	343.408	1.0878	15.2247	28.5175	64.829	0.8408	160.866	1.34396	high
TCGA-DV-5575	4.73699	0	15.142	1.9885	0.7585	258.112	1.1994	8.0185	20.3932	39.5687	4.4575	526.964	0.257143	low
TCGA-DV-5568	1.0137	0	5.8621	0.2983	1.9227	884.161	2.9005	11.095	22.3147	44.9607	1.8112	179.981	1.42113	high
TCGA-B8-4148	4.16438	0	16.5325	0.2678	2.2209	235.28	6.3638	1.3834	18.6195	36.7835	7.5527	274.001	0.662753	low
TCGA-B2-4099	2.66301	0	8.4663	0.0627	1.8225	338.014	1.9909	15.2049	24.0112	80.8203	6.6717	135.64	1.85078	high
TCGA-B0-4697	1.58356	1	4.105	3.3642	4.2513	532.314	9.0056	16.2214	5.5768	41.3694	1.6874	77.3945	3.8493	high
TCGA-BP-4967	0.561644	0	14.7837	0.2713	0.6547	386.703	0.5722	2.9363	22.8681	42.0099	10.185	60.894	1.25188	high
TCGA-AK-3425	9.1589	0	8.6494	0.8918	2.9155	325.349	2.7583	5.2375	22.8392	78.9216	13.2262	89.5092	1.67125	high
TCGA-B4-5835	0.0438356	0	17.2729	0.1774	2.4038	183.47	0.6715	0.3901	27.5601	20.9391	24.5225	31.0771	0.817888	low
TCGA-BP-4158	9.25205	0	14.0037	0.1483	0.7071	399.71	1.3697	11.3244	22.5873	64.9052	2.119	275.072	0.888588	low
TCGA-B0-5696	7.14795	0	15.2386	0.5045	2.1984	417.538	0.4563	9.0688	33.2969	123.265	3.7249	206.639	1.35037	high
TCGA-BP-4968	4.78356	0	9.0282	0.2838	2.3756	760.131	3.5847	15.9247	28.699	49.7032	3.9253	216.866	1.21107	high
TCGA-A3-3319	3.09589	0	10.7868	0.1906	1.567	405.68	1.2212	1.9539	29.793	179.51	19.1827	125.09	1.62884	high
TCGA-CJ-4923	1.56712	1	6.0512	2.4714	1.3626	595.326	4.218	11.4327	20.5404	47.6503	3.9549	115.869	1.92918	high
TCGA-BP-5175	2.55342	0	9.0377	0.2153	3.8608	1446.95	2.0902	7.5688	24.0341	50.9332	4.0694	44.1253	2.15147	high
TCGA-CJ-4918	0.254795	1	11.0202	6.2046	1.4595	289.033	1.7371	16.2555	17.7823	51.1612	1.4472	280.899	1.15416	high
TCGA-A3-3373	4.4411	0	25.5986	1.8941	1.2865	198.002	0.2956	2.0422	24.283	36.8548	19.9099	297.947	0.31391	low
TCGA-B0-4706	0.178082	1	15.1183	0.3369	1.8335	584.843	2.3656	38.8263	15.4345	91.1526	6.2405	143.607	2.97812	high
TCGA-CW-5581	7.66849	0	20.2761	0.1488	0.4604	336.421	0.9353	4.6599	24.9012	89.9986	2.6574	190.222	1.08852	high
TCGA-BP-4761	0.49863	0	21.1262	0.5072	3.9868	1125.82	2.0007	4.7711	37.8387	245.496	8.6266	27.9609	4.08506	high
TCGA-G6-A8L6	0.857534	1	7.9238	0.1584	1.2042	1347.23	0.8575	15.2272	11.7491	80.9284	3.2754	248.206	1.32861	high
TCGA-BP-4762	3.67945	1	14.2105	11.9254	0.8285	313.396	1.2298	9.9294	22.3413	63.7301	5.7779	279.406	0.960393	low
TCGA-AK-3454	2.39452	0	11.1192	0.812	1.9137	1001.2	1.373	21.6217	8.9195	33.3775	4.8979	98.8901	2.14064	high
TCGA-CJ-5681	1.51233	1	26.5206	0.0505	1.7657	34.3286	0.092	1.4093	38.5768	23.1342	0.1241	46.8106	1.12627	high
TCGA-BP-4771	0.443836	1	10.5365	1.0798	2.0556	347.059	12.5108	8.5847	14.104	46.3134	2.0169	131.572	2.19967	high
TCGA-BP-5182	3.19178	0	18.9236	4.7252	1.5612	317.861	1.6627	6.0857	22.193	41.2704	6.2867	176.56	1.00195	low
TCGA-BP-5186	1.89863	0	19.2169	5.3897	0.8374	329.575	1.4254	5.7485	31.5719	49.6622	6.6917	575.32	0.181453	low
TCGA-B0-4837	3.77534	1	9.1627	0.7532	7.0141	582.414	0.5596	5.8722	36.2895	66.5487	3.9061	103.178	1.79401	high
TCGA-B8-A54H	0.70137	0	16.2338	0.7437	2.083	268.841	2.9811	6.2198	25.4862	47.4748	9.4562	165.169	0.988301	low
TCGA-A3-3347	4.41096	1	10.0533	7.9084	1.7118	312.04	2.1502	3.5418	18.858	47.3297	10.522	113.08	1.45874	high
TCGA-AK-3431	6.13973	1	7.99	3.402	1.3347	500.185	0.4788	9.0998	14.0178	62.2232	2.5569	312.761	0.899415	low
TCGA-BP-4803	0.558904	0	9.5744	0.4148	1.6156	430.375	1.1073	4.5285	30.0121	72.4987	9.529	183.923	0.992555	low
TCGA-CZ-5461	0.90411	1	9.7581	1.0461	1.5695	538.87	1.2013	11.4914	19.561	79.8255	13.8143	173.164	1.22939	high
TCGA-CJ-4907	4.10685	0	13.3651	4.5636	0.6036	446.361	0.9573	20.1698	22.0856	36.4801	5.4413	241.326	1.03097	high
TCGA-BP-4331	6.72329	1	14.8093	0.4749	1.1396	266.621	1.6184	4.1494	22.7102	55.0868	4.3569	202.623	0.948976	low
TCGA-BP-4969	4.91507	0	13.9203	0.299	0.8698	324.66	0.3658	6.5743	22.9411	23.5776	9.9974	165.286	0.814601	low
TCGA-B0-5706	8.78082	0	14.5359	0.2445	1.6853	498.24	1.1986	2.514	16.5544	57.6917	0.8954	101.981	1.63064	high
TCGA-B0-5098	4.33973	1	17.3143	0.2747	7.2205	203.337	0.1471	1.0635	8.1044	53.295	31.3183	73.7678	0.990683	low
TCGA-BP-4165	8.32055	0	20.7313	0.176	4.6682	402.384	2.835	17.7653	24.7156	52.6156	4.1013	243.344	1.07437	high
TCGA-BP-4166	0.0356164	0	6.4965	2.2288	0.7609	374.22	1.2218	15.5184	13.7876	53.0057	2.2101	180.447	1.68199	high
TCGA-B0-4810	1.30959	1	9.8528	1.1938	2.9601	544.254	4.405	28.7323	14.4024	75.8321	0.8528	258.923	1.98324	high
TCGA-CJ-4639	8.84658	0	14.4061	0.1293	1.0378	281.086	4.8017	7.504	17.7426	43.8114	4.4417	239.999	0.922173	low
TCGA-BP-4169	1.92055	1	4.9845	5.3077	2.5206	471.034	0.7259	13.7802	12.9719	37.709	2.5063	326.501	0.940809	low
TCGA-G6-A5PC	0.663014	1	19.1159	0.1309	3.0114	777.435	1.9088	7.4411	23.3272	24.3229	1.9219	98.4952	1.35595	high
TCGA-CJ-5679	1.86027	1	10.6028	1.1424	3.8493	893.139	0.7008	5.841	36.117	67.875	13.092	70.8036	1.41306	high
TCGA-B2-3924	2.99178	0	7.69663	0.623367	1.24087	284.478	5.05017	4.23233	16.5962	44.6233	8.87843	149.874	1.27945	high
TCGA-CJ-4890	9.6411	0	5.8392	11.1195	1.6074	418.183	4.0634	9.8097	10.4534	29.4616	1.9447	201.951	1.6637	high
TCGA-B0-5081	0.991781	1	7.0786	2.8985	2.8096	417.874	5.4415	18.1316	8.6123	47.8819	3.3222	108.052	2.81834	high
TCGA-A3-3383	2.3589	0	20.5305	0.1306	1.312	439.823	1.6729	12.0403	27.4703	120.407	10.5297	184.57	1.24847	high
TCGA-CJ-4884	4.81918	0	8.8289	0.1589	1.9572	398.464	2.9185	6.3027	25.4284	50.9296	0.9185	115.503	1.68547	high
TCGA-B0-5700	4.90411	0	20.721	0.2447	1.804	481.79	0.4568	14.0876	27.1566	90.4875	9.5782	402.601	0.462446	low
TCGA-A3-3320	4.13151	0	15.6274	0.1632	0.8736	157.064	0.7099	5.5318	27.3104	53.6723	5.3843	395.66	0.39284	low
TCGA-BP-4344	4.56438	0	10.529	2.5261	0.955	296.763	0.5722	31.2958	15.8628	38.7794	2.9066	266.659	1.34563	high
TCGA-B2-4098	0.139726	1	20.5877	0.4378	0.6357	158.219	0.7894	0.1919	23.2216	19.1476	3.0617	27.385	1.34604	high
TCGA-B4-5378	0.479452	0	25.7971	0.6545	0.7165	210.833	0.3692	4.705	6.276	33.7293	0.7079	398.668	0.406756	low
TCGA-CZ-5466	1.87671	0	16.5134	1.8641	1.8789	293.676	2.2313	2.8113	28.8116	90.7142	19.6134	130.374	0.989243	low
TCGA-B0-4811	3.88219	1	9.0773	1.0889	1.9013	745.38	1.6672	47.3939	21.3386	79.8217	6.936	129.357	3.52356	high
TCGA-CZ-5453	6.6274	1	27.1697	0.0741	0.7287	131.531	0.3476	7.1445	29.4492	89.5527	2.3244	327.921	0.567509	low
TCGA-BP-4998	2.55342	0	15.457	2.371	1.0568	168.529	1.3394	8.7116	14.0216	38.3235	9.1673	216.167	0.879737	low
TCGA-BP-5194	1.11781	0	21.8504	0.0985	1.2986	445.897	0.5968	7.2369	30.5653	61.8172	9.9198	285.299	0.518672	low
TCGA-B8-A54E	2.49041	0	6.2273	0.0292	0.1303	80.1863	0.2244	2.0821	49.5185	26.5045	2.432	22.0263	1.392	high
TCGA-CJ-5680	2.10411	1	31.7775	1.1424	0.3036	210.829	0.1515	7.1342	30.0538	66.2672	7.041	231.37	0.605174	low
TCGA-B8-4619	1.43288	0	34.151	6.2965	0.3301	27.2637	0.0735	1.0528	2.3441	10.9241	0.4682	163.453	0.881677	low
TCGA-B0-4718	4.87123	0	7.5702	0.0837	3.0238	824.318	1.5597	11.5553	11.9816	94.3534	2.7114	169.282	2.07317	high
TCGA-CW-5588	5.52603	0	9.16	3.5327	0.6205	656.791	0.7849	5.8951	17.2392	97.2076	9.0152	186.614	1.33871	high
TCGA-B4-5832	0.424658	0	0.7126	0.8988	0.9466	684.071	0.5719	0.5586	9.6811	10.0812	28.5778	132.527	0.664391	low
TCGA-CJ-4878	5.98904	0	9.1781	0.3063	2.2778	274.113	0.1003	3.6068	27.5875	48.9375	0.3666	364.035	0.543492	low
TCGA-CZ-4864	3.60274	1	13.1037	0.4329	2.1486	189.043	4.0672	4.3198	20.4438	30.0913	16.1226	271.272	0.536973	low
TCGA-BP-4326	4.45205	1	5.5393	0.0994	2.8561	947.112	0.4913	9.3927	11.0417	84.1061	1.7792	119.566	2.36691	high
TCGA-CJ-4637	6.10137	1	9.0825	1.1946	2.9082	577.223	14.779	2.6258	11.6368	42.3997	3.5486	54.3777	2.85734	high
TCGA-BP-4781	5.69863	0	13.5633	1.4632	0.4537	381.24	0.6337	2.9221	21.7268	58.7405	10.0465	126.628	1.10254	high
TCGA-CJ-4875	9.73699	1	13.9382	0.0649	2.3002	709.462	7.4691	19.9684	21.4001	60.5909	14.2084	159.473	1.46313	high
TCGA-CJ-5678	1.5726	1	10.9485	0.0165	5.3167	592.115	5.9546	3.6176	26.5388	86.5169	6.6577	69.2274	2.31546	high
TCGA-B0-4847	2.1726	1	22.8625	0.0755	1.5083	468.813	6.3368	5.8875	21.5495	71.3807	12.6381	101.29	1.30241	high
TCGA-CZ-4853	2.12055	0	24.9285	0.1263	1.4694	359.77	1.2666	5.6143	34.528	65.2294	16.7555	244.286	0.477111	low
TCGA-CZ-5468	0.161644	1	5.2943	0.0493	0.6839	427.062	1.284	4.0621	15.6541	27.1762	2.2651	63.1139	1.80663	high
TCGA-CZ-5986	1.02192	0	27.5825	0.1019	0.3032	272.95	0.8087	4.8115	22.4688	23.3288	21.8892	170.985	0.455629	low
TCGA-B0-5711	10.9288	0	19.5688	0.3038	1.0978	399.414	1.4636	4.3802	22.5978	52.2252	12.8654	325.747	0.418902	low
TCGA-BP-4345	4.15342	0	5.0701	6.1857	2.2371	620.951	1.302	28.4851	4.6411	24.6176	0.7445	188.931	2.33986	high
TCGA-A3-3346	0.375342	1	5.4871	0.2074	6.4391	591.201	1.5359	0.8382	19.5602	95.8555	0.2638	6.5043	3.84731	high
TCGA-BP-4789	4.07945	0	13.2865	4.0006	1.3858	398.097	0.2892	12.699	17.6687	52.3423	5.1928	415.671	0.506637	low
TCGA-CJ-4642	8.78082	0	22.6466	3.8614	3.4995	207.351	0	2.0373	9.4439	20.6677	5.5368	85.7091	1.33811	high
TCGA-A3-3325	3.20548	1	16.4526	1.7356	0.6994	294.809	0.5724	14.1696	28.0102	69.7383	8.4715	142.133	1.29779	high
TCGA-B8-5549	0.531507	0	17.5848	0.0996	1.1635	286.541	1.1716	0.5711	36.1127	95.7102	1.8186	342.34	0.550272	low
TCGA-A3-A6NJ	1.28219	0	12.1475	1.4833	1.0436	184.5	4.0877	3.8096	20.3043	38.5836	9.5803	339.773	0.497852	low
TCGA-B0-5100	5.2411	1	16.5599	1.0944	0.4884	881.029	0.4081	47.1613	7.2943	41.0996	0.9316	147.66	2.90979	high
TCGA-B0-4849	0.189041	1	11.4842	0.0517	1.3259	521.662	1.2295	7.3539	20.4712	65.3054	0.6314	201.008	1.24354	high
TCGA-CJ-5684	6.11233	0	16.6165	0.6536	1.2498	525.001	4.062	4.7609	23.2838	87.1451	7.7761	274.39	0.796526	low
TCGA-B8-4153	2.08767	0	14.4573	0.0084	2.7538	918.413	0.5659	15.3836	23.3843	68.7642	8.543	341.968	0.640663	low
TCGA-A3-3387	1.69041	0	12.1215	2.7859	2.7213	307.603	0.8254	6.0519	13.0246	35.0762	8.6927	112.586	1.41276	high
TCGA-CZ-5982	6.68219	0	10.9908	0.1809	0.4618	270.697	0.4088	1.9309	26.5651	54.0364	13.3633	493.097	0.211401	low
TCGA-BP-4774	5.16438	0	11.7455	0.0527	1.3402	239.542	1.0245	24.3428	21.172	59.7698	7.3331	326.101	0.843426	low
TCGA-A3-3331	3.44384	0	16.0019	0.2117	1.7868	220.75	1.5452	6.322	33.5017	35.4746	7.7835	268.218	0.560742	low
TCGA-BP-4992	1.3726	0	7.5017	0.0887	5.6029	393.821	5.7952	4.5807	14.8068	27.9676	3.1212	62.0496	2.34111	high
TCGA-BP-4798	0.915068	1	1.6902	1.6459	4.0546	296.221	5.6349	3.0813	9.2175	55.2841	5.8869	52.4403	2.86756	high
TCGA-B2-5641	1.79726	0	19.617	0.1946	2.7346	202.072	5.3462	2.4206	28.8927	89.1176	10.437	110.742	1.38081	high
TCGA-CJ-4912	4.53973	0	10.2388	0.0479	2.025	773.256	0.8717	5.8205	21.1224	49.6015	13.6844	104.584	1.1891	high
TCGA-B4-5844	0.0191781	0	18.5804	0.0459	1.3028	288.743	0.4151	4.7461	26.9556	48.0685	3.1924	412.562	0.356198	low
TCGA-B8-5159	1.97808	0	17.0486	0.2848	0.6115	261.418	1.3618	0.4993	30.7375	50.0616	10.9798	190.658	0.65992	low
TCGA-DV-5567	5.49041	0	40.8837	0.1971	1.0906	280.918	0.0963	4.5718	10.9415	18.9186	1.8267	229.792	0.545982	low
TCGA-B0-4834	5.72603	1	33.4869	8.7614	0.4262	41.4006	0.0367	1.9878	1.8586	9.2784	0.2956	134.486	1.07035	high
TCGA-B0-5117	4.40548	0	12.6148	0.2571	1.0029	49.016	0.3229	3.7717	1.5632	12.8337	0.7787	271.237	0.772364	low
TCGA-BP-4987	3.07945	0	14.4421	0.4653	0.8401	230.279	1.9421	6.5933	25.878	80.0035	5.2797	404.97	0.474955	low
TCGA-AK-3429	9.11781	0	11.2732	0.0703	1.2351	373.22	7.3894	8.9122	16.6675	34.4559	14.7752	171.037	1.02951	low
TCGA-B8-4622	4.17808	0	13.5881	0.2342	0.4778	332.859	1.227	4.7115	28.9544	84.1348	14.5268	110.137	1.15135	high
TCGA-BP-5008	2.93425	0	14.1158	2.533	1.056	266.095	1.0725	8.9303	14.2041	25.1926	5.527	217.719	0.908872	low
TCGA-BP-5006	2.30137	0	11.143	0.261	0.5927	408.133	0.7689	3.7006	28.0841	79.9817	7.5126	303.965	0.625394	low
TCGA-BP-4776	1.12603	0	11.7823	0.578	4.8059	436.388	1.019	15.3842	17.4595	52.276	1.2213	473.075	0.517639	low
TCGA-A3-A8CQ	0.00821918	0	15.0932	0.6628	2.0773	165.096	0.4771	8.981	20.1931	40.8137	5.1919	293.54	0.675718	low
TCGA-BP-4164	2.71781	1	18.162	0.1634	1.7206	180.317	0.5401	4.8953	32.4816	62.4263	6.9394	153.921	0.977101	low
TCGA-B0-5709	10.8877	0	13.4797	13.6049	0.8206	330.275	2.3247	6.4315	17.8819	38.4436	7.5983	326.844	0.689806	low
TCGA-CW-6087	0.112329	1	11.2252	1.4503	0.87	167.882	12.8762	0.4293	9.3881	27.8757	20.3407	10.9718	1.75663	high
TCGA-AK-3426	2.42466	1	8.8504	2.7606	1.9044	747.203	9.8599	8.4835	5.751	19.9183	3.7739	44.9176	2.7263	high
TCGA-BP-5180	6.2	0	26.1498	0.036	0.9346	709.568	0.9908	3.832	41.5242	79.916	12.3856	59.8699	1.03582	high
TCGA-DV-5573	3.09589	0	17.3263	3.7743	1.2126	256.682	7.9284	2.3893	26.6098	44.2268	7.1364	212.854	0.887867	low
TCGA-A3-3362	4.27123	0	15.4246	2.0544	1.1336	315.88	0.6414	4.4811	34.4013	43.3294	7.8189	306.645	0.47516	low
TCGA-B0-5713	7.62192	0	19.0136	0.0421	2.6797	256.468	1.3282	9.1667	29.7345	48.9336	4.4423	240.726	0.787442	low
TCGA-B8-4146	1.4	0	3.9055	0.0352	0.5906	588.421	2.0929	0.3425	14.8019	18.1977	16.8835	193.818	0.669487	low
TCGA-BP-4977	1.24384	0	11.8598	0.2263	1.9197	281.898	1.2304	7.3536	33.2397	106.164	13.6859	94.5871	1.54144	high
TCGA-BP-4986	2.15068	0	10.2245	3.0759	2.7634	415.822	1.3145	6.6955	11.0577	34.7853	7.533	145.304	1.37126	high
TCGA-B4-5377	1	0	18.0478	0.7471	1.0666	250.637	0.8974	5.9469	28.9704	19.2431	21.7197	357.583	0.242411	low
TCGA-CJ-4891	2.24384	1	3.3679	1.1522	2.1433	616.478	0.8446	8.5901	14.9957	52.7793	1.2418	74.1362	2.42876	high
TCGA-BP-4961	5.30137	0	10.901	0.7717	0.584	395.582	0.3973	2.1677	18.5598	49.4255	5.8743	490.674	0.278311	low
TCGA-CJ-5677	2.14247	1	12.5108	2.6431	0.638	520.141	0.9788	7.3282	13.595	56.5717	11.3322	130.148	1.28443	high
TCGA-BP-5199	3.71233	0	11.1438	0.9041	1.5006	807.256	6.852	36.7394	11.4991	42.1082	0.7498	148.117	3.02811	high
TCGA-6D-AA2E	0.991781	0	14.9782	2.3177	0.3211	120.525	0.5258	3.3573	57.8079	13.5936	6.0887	199.494	0.501475	low
TCGA-B0-4703	0.49863	1	6.1304	10.1646	1.7849	554.101	2.3633	13.8295	6.5633	29.7265	1.5421	147.375	2.21541	high
TCGA-B8-5162	0.0986301	0	6.351	3.0008	0.8775	498.981	3.0263	5.1654	11.7323	26.8196	3.1821	168.096	1.32883	high
TCGA-B8-5163	2.25205	0	5.0867	5.4514	1.2924	526.069	3.1332	6.9626	6.7426	40.814	3.151	137.993	1.91142	high
TCGA-B0-5092	1.25753	1	8.7038	1.6188	3.0498	583.008	8.5756	7.8796	18.2643	47.6836	1.2262	70.4657	2.65714	high
TCGA-CZ-4857	3.92329	1	12.4318	1.5112	0.5408	755.315	1.4615	6.5894	21.2103	81.0595	16.5623	66.5942	1.47876	high
TCGA-BP-5001	3.22466	0	16.3344	0.2575	1.5912	386.598	2.8315	16.9838	26.1963	36.5756	6.1583	140.669	1.31934	high
TCGA-B0-4693	0.210959	1	13.2423	0.061	1.1469	223.731	1.8855	7.1341	26.0781	97.4724	4.5605	166.624	1.44019	high
TCGA-BP-4964	5.10137	0	11.2205	0.2823	1.9188	572.35	1.1263	7.3743	25.6381	92.482	7.1733	217.001	1.10805	high
TCGA-BP-4769	5.13973	0	21.7902	2.1698	0.8943	250.579	0.136	47.0031	12.3163	20.9637	0.7116	368.516	0.993714	low
TCGA-BP-4797	3.03288	0	7.2345	1.3786	1.0467	275.759	1.8229	4.0715	18.5471	42.8428	9.1038	114.614	1.33425	high
TCGA-T7-A92I	0.975342	0	15.2693	0.6949	0.1302	62.2536	0.3214	0.7212	66.5825	15.2793	0.6022	56.8606	0.868385	low
TCGA-CJ-4876	5.35616	0	19.0545	0.1179	3.1335	416.697	3.2192	6.6074	17.3015	18.5485	11.3546	78.1946	1.23097	high
TCGA-BP-4763	3.47945	1	7.8426	2.7104	1.4174	656.382	0.8639	9.1083	15.3786	35.4177	5.4154	396.16	0.505557	low
TCGA-BP-4971	4.07397	0	9.4915	5.0198	2.3227	363.335	1.6533	47.0446	6.4674	26.6907	0.6306	134.618	3.88631	high
TCGA-BP-4167	7.44658	0	7.8414	4.8297	3.8299	571.475	5.7202	10.3109	9.9149	38.0146	3.6604	106.166	2.40993	high
TCGA-BP-4163	7.77808	0	13.3959	1.466	2.0847	312.886	0.9003	7.6475	33.345	86.9638	2.3549	126.546	1.64135	high
TCGA-B0-5106	4.37808	1	8.3885	0.1688	1.4602	540.681	1.4728	3.7334	13.6245	67.6253	3.4551	115.879	1.75111	high
TCGA-B8-5158	3.33699	0	7.8226	0.0182	1.1496	428.778	1.8273	3.5525	38.6326	49.5327	13.2182	58.1813	1.21981	high
TCGA-BP-4332	3.10411	0	14.2531	0.567	1.1748	328.273	0.8134	12.8498	20.2965	53.7776	1.0715	188.386	1.30227	high
TCGA-B0-5084	0.608219	1	16.8228	0.4551	3.2083	603.335	0.6727	2.4967	24.261	50.1723	48.008	40.3657	0.550071	low
TCGA-CZ-5452	4.90137	0	13.8763	0.0198	1.9748	390.224	5.6951	1.9796	21.4296	66.6277	1.9567	132.728	1.57649	high
TCGA-B8-A54G	0.145205	0	18.4994	0.0149	2.7616	268.332	13.5183	1.7057	23.8142	35.2679	3.1527	25.0836	2.26071	high
TCGA-CJ-4904	9.04658	0	11.7656	0.3475	0.9962	318.719	0.9546	5.8669	16.3955	38.4205	10.0311	459.381	0.296441	low
TCGA-A3-3351	2.49315	0	14.4518	0.3695	0.6142	367.007	3.6903	6.1264	20.0269	38.9484	5.4995	108.173	1.36221	high
TCGA-B2-5636	2.51781	0	21.2198	1.6284	1.2517	188.927	0.4807	4.0537	9.9512	24.9353	2.328	433.692	0.343055	low
TCGA-B0-5110	5.50411	0	14.3175	0.9238	0.826	257.043	1.6457	12.3193	22.1363	48.3879	9.0481	283.015	0.691654	low
TCGA-CZ-5987	1.21918	1	23.1698	0.007	2.6206	425.149	1.0238	4.0146	28.9119	85.6552	9.062	67.9029	1.44535	high
TCGA-B0-5399	3.86575	0	12.9721	3.4186	0.6384	507.383	2.6495	18.833	32.701	56.9563	10.1642	203.084	1.06746	high
TCGA-BP-4349	1.01918	0	11.4461	0.4661	1.2012	482.079	0.6414	11.6518	25.2532	38.6545	4.239	304.497	0.661627	low
TCGA-B2-A4SR	1.38904	0	23.1381	0.1913	0.7962	248.418	0.7226	8.5827	15.2938	55.8034	3.7836	461.486	0.336183	low
TCGA-CJ-4889	5.33151	0	13.7218	7.7893	1.5315	212.701	2.6092	6.8637	10.8581	28.0053	1.6311	282.676	0.91515	low
TCGA-CZ-4856	0.0493151	0	17.4328	0.1463	2.1151	324.966	2.6956	13.1088	26.2075	66.3951	12.3329	469.232	0.32241	low
TCGA-AK-3451	7.85753	0	10.6623	0.4564	5.6668	528.472	1.063	8.5874	21.8985	66.7951	2.2939	97.9332	2.18693	high
TCGA-B0-5104	8.21918e-06	1	8.0607	0.4169	0.5796	189.902	0.7204	3.1854	27.4111	78.2637	16.3846	193.159	0.814866	low
TCGA-BP-4330	5.1726	0	13.1526	0.7576	1.0462	267.062	4.9487	5.2985	26.5059	49.3236	7.6452	217.697	0.870474	low
TCGA-B0-5119	4.25205	0	18.7936	0.7666	1.3155	221.261	2.427	6.0204	33.4927	78.2349	8.2669	444.893	0.328937	low
TCGA-B0-4815	4.35068	1	7.9923	1.4223	2.3572	266.339	7.5521	2.4512	16.6915	28.5018	2.7132	61.8192	2.12587	high
TCGA-BP-4176	5.35616	0	6.7345	0.7194	1.5078	430.204	0.8813	2.9328	13.844	66.3702	17.1616	94.9504	1.33932	high
TCGA-BP-4790	3.04384	1	10.5478	4.0375	0.8183	403.109	2.878	6.0629	15.28	52.2746	7.895	244.341	0.927993	low
TCGA-DV-A4VZ	1	0	22.1106	0.1295	2.1341	430.063	0.0571	8.1368	4.2188	36.4182	0.1524	78.8118	1.81087	high
TCGA-CJ-5683	5.17534	0	17.1831	0.7567	2.2965	525.487	0.3617	21.0068	34.1394	48.6955	2.975	292.229	0.789585	low
TCGA-DV-5566	3.83014	0	17.3364	0.8077	1.1529	359.53	0.6767	4.8914	36.8884	76.828	14.2896	273.286	0.513501	low
TCGA-B8-5164	0.0712329	0	15.6772	0.0634	0.3006	300.683	6.6258	1.1816	19.8344	26.1361	21.1159	216.032	0.517482	low
TCGA-B0-5099	1.32877	1	21.6392	0.1435	1.9793	296.85	0.3058	6.5422	25.2891	66.5839	1.2981	223.959	0.914089	low
TCGA-BP-4985	2.60822	1	8.4202	1.9467	2.7706	275.865	0.6972	11.1129	3.6613	38.2089	2.2971	78.5456	2.45492	high
TCGA-BP-4795	1.69863	0	25.8077	11.1572	0.6778	302.358	0.4468	15.7601	5.9065	16.5264	1.8503	484.892	0.381261	low
TCGA-B8-5545	4.17808	0	17.2138	2.4038	0.6549	348.39	1.1143	14.1394	9.6589	40.8162	7.5299	168.128	1.2416	high
TCGA-GK-A6C7	0.167123	0	24.9523	0.3752	2.9952	252.855	0.5286	5.9176	19.1438	59.07	12.2648	386.632	0.357487	low
TCGA-CJ-4885	9.45479	0	16.9353	0.1865	2.6681	344.96	0.4395	8.4862	30.265	58.1266	21.1754	203.991	0.615179	low
TCGA-B0-4688	0.276712	1	7.7168	35.0904	9.7007	420.347	0.344	4.3495	6.8351	48.2554	2.3292	71.3691	5.37063	high
TCGA-B0-5088	1.54247	1	13.0709	0.8134	1.8531	293.664	1.2654	11.5013	16.6261	38.4985	3.292	215.528	1.08774	high
TCGA-BP-4162	8.42192	0	9.2493	0.391	1.4132	257.675	3.3336	3.6125	21.7885	41.4963	4.377	345.463	0.563971	low
TCGA-BP-5174	6.18356	0	17.0741	0.5301	1.2609	453.623	1.0135	6.2296	44.8884	72.8918	12.5744	193.417	0.693236	low
TCGA-BP-4352	0.942466	1	6.277	1.7269	21.3442	1433.39	0.3049	0.9162	7.2234	75.0205	0.2109	19.9122	5.99524	high
TCGA-B0-5097	1.82192	0	5.5138	3.9658	1.737	541.869	0.3727	11.1939	7.9835	43.6568	1.9314	157.59	1.81994	high
TCGA-B0-5077	3.60822	1	16.4567	0.134	0.5182	250.073	1.0288	20.2128	30.6151	79.6755	0.4034	168.89	1.61939	high
TCGA-B0-4843	0.876712	1	6.0175	1.4018	5.1713	776.828	0.7537	16.4355	12.897	46.7824	3.1579	88.7417	2.66812	high
TCGA-CW-5585	7.14795	0	27.9212	0.2826	0.8689	314.16	0.2895	9.3187	41.0456	64.5613	9.308	301.341	0.42282	low
TCGA-CJ-4638	1.18082	1	25.1638	0.6722	0.3268	350.754	1.6411	15.3572	33.0889	98.495	3.2727	57.1948	2.06574	high
TCGA-B2-3923	2.71781	0	12.5301	1.512	0.112133	24.3335	0.3295	1.6497	1.4502	7.65037	0.440967	224.72	0.874387	low
TCGA-AK-3461	6.07397	0	13.0712	2.4174	1.4132	228.599	0.7374	3.663	21.1044	43.411	4.3524	460.395	0.332206	low
TCGA-B0-5707	10.2575	0	36.894	1.4011	5.3053	213.257	0.2373	0.4946	46.4829	14.16	27.1915	23.8677	0.524016	low
TCGA-A3-3374	3.6	0	15.4945	0.6499	0.8353	150.012	0.187	0.3821	3.6226	19.1032	0.2062	221.631	0.865736	low
TCGA-A3-3313	2.0137	1	11.0256	0.9124	0.3175	59.5387	0.3365	4.9788	71.4201	49.5002	5.7775	88.9763	0.893046	low
TCGA-A3-3311	3.26301	1	10.8549	1.1045	0.4434	256.733	1.6857	4.53	21.9983	72.0321	11.0603	94.0028	1.44538	high
TCGA-A3-3372	2.0137	0	8.423	0.6696	1.4196	218.781	1.1653	8.5033	14.8901	71.7917	10.9528	211.268	1.09858	high
TCGA-B0-4694	0.290411	1	10.2822	3.8642	3.0972	427.878	3.8198	4.2686	21.6554	116.399	6.727	150.769	1.98701	high
TCGA-B0-4696	2.3726	1	6.5667	25.0782	21.73	216.919	0.0733	1.306	11.6783	51.3667	0.0907	19.2682	8.39338	high
TCGA-A3-3365	2.39178	0	11.7875	3.5974	0.7533	312.736	0.8454	26.0796	12.259	32.7664	7.5516	476.706	0.461245	low
TCGA-B0-4842	4.72329	1	16.1733	0.4127	2.1757	361.28	2.4999	7.2358	23.2534	91.3315	0.4206	37.632	2.72072	high
TCGA-BP-5189	2.25205	1	7.9287	0.4495	1.0324	401.114	0.4405	4.6471	25.6776	67.7072	8.5782	202.155	0.953955	low
TCGA-A3-3352	1.53699	1	16.4335	0.0648	1.287	359.194	1.2274	5.9687	24.6803	80.0064	6.6046	192.448	1.03985	high
TCGA-CJ-4868	1.76986	1	7.2009	2.5181	1.4739	834.918	1.4858	10.8152	13.4729	52.4956	3.4011	217.764	1.28799	high
TCGA-EU-5907	0.347945	0	9.6485	0.3629	1.5176	619.815	0.3725	1.0746	32.2408	50.6306	28.5163	269.618	0.337044	low
TCGA-CJ-4636	5.27123	0	10.8351	1.6158	1.2567	352.73	4.5179	8.2971	17.4421	52.5236	1.1566	204.414	1.34112	high
TCGA-A3-3326	3.11507	0	21.8059	0.1806	0.3527	315.207	0.7592	11.0231	25.3367	47.4901	4.8668	244.135	0.717485	low
TCGA-CZ-4854	3.84658	1	10.8654	1.2986	1.6251	549.449	1.9988	4.7007	17.2382	73.8793	17.5309	64.2428	1.52427	high
TCGA-BP-5170	6.60822	0	9.2159	1.0917	0.9881	872.459	0.6865	5.4691	19.337	74.9238	9.5525	327.93	0.612451	low
TCGA-B0-5691	9.4	0	17.5274	9.4796	0.6325	187.562	0.6592	7.2109	28.064	32.275	12.5942	455.089	0.267094	low
TCGA-CZ-4865	0.454795	1	13.9797	1.2149	1.3455	350.425	2.9828	6.0172	25.2029	37.1757	5.9642	260.106	0.704607	low
TCGA-B0-5812	10.5041	0	10.7441	2.5139	0.3333	662.619	1.6795	11.4833	18.7713	51.9416	7.1178	507.881	0.317701	low
TCGA-CJ-5676	11.1425	0	7.8257	0.6379	2.9484	840.007	1.6871	6.5793	18.4527	53.7892	11.324	155.303	1.20891	high
TCGA-B0-4814	0.460274	1	13.0628	0.8913	0.8869	591.804	0.5005	13.0426	39.9857	85.8154	12.4025	224.013	0.817355	low
TCGA-B0-4839	4.49041	1	10.4927	0.1699	3.711	895.976	1.4178	6.6033	14.0489	64.8684	1.9807	239.266	1.17953	high
TCGA-B0-4710	4.80822	0	13.6728	0.7803	1.0879	322.872	1.2196	8.9961	23.8031	70.5171	1.1929	110.183	1.78458	high
TCGA-B0-5113	3.21918	0	14.197	1.1019	0.5281	263.287	1.5094	11.5666	15.8643	34.5075	11.5411	228.53	0.78035	low
TCGA-CJ-6027	9.90411	1	9.1113	0.3298	2.3544	1082.29	11.1462	2.8709	13.5141	71.2853	9.0794	23.8967	2.78367	high
TCGA-EU-5905	0.326027	0	15.4975	0.6629	0.6069	1068.41	0.5328	1.3967	9.1307	47.6748	8.3279	129.649	1.09862	high
TCGA-CJ-4916	3.76164	0	9.713	0.2586	1.4075	369.426	10.8324	17.3446	24.8104	43.0196	6.4014	222.798	1.32309	high
TCGA-BP-4173	5.1863	0	9.8489	2.105	0.9981	333.896	6.3369	9.7345	15.8627	27.735	8.2409	99.8422	1.65405	high
TCGA-B0-5075	1.74521	1	18.934	0.0304	0.9477	240.981	2.7252	3.9415	31.0525	48.694	2.0196	40.9712	1.63781	high
TCGA-B0-5115	4.39452	0	13.1078	1.2087	0.9098	400.435	0.6815	13.8762	19.0566	50.2967	5.2098	397.998	0.512756	low
TCGA-BP-4338	7.83288	0	10.585	0.1808	1.0303	697.731	0.6505	1.109	34.754	115.154	1.1912	24.419	2.48279	high
TCGA-CJ-5682	10.2356	0	12.4879	2.4679	1.4104	558.322	1.3936	9.5095	13.4877	76.8383	15.3771	301.065	0.695004	low
TCGA-A3-3385	5.46027	0	37.2491	0.1274	0.3088	249.979	0.173	0.7969	40.0357	52.4734	31.7416	193.004	0.249731	low
TCGA-BP-4760	6.46849	0	37.6213	4.0822	1.4017	286.87	0.0789	14.9301	10.8936	21.0474	0.4849	422.999	0.363621	low
TCGA-B0-4707	1.64384	1	24.5806	1.7992	1.6714	450.199	1.1294	6.766	14.9278	63.9456	6.5488	57.6839	1.6989	high
TCGA-A3-3357	7.36438	0	13.4547	0.0066	1.5864	171.841	2.253	1.0918	25.6686	78.4303	1.3426	97.3955	1.71278	high
TCGA-CW-6090	6.99178	0	3.0439	0.2249	3.5016	1205.74	1.3513	3.6881	11.8426	79.4561	1.578	107.371	2.33032	high
TCGA-BP-4959	7.28767	0	14.407	0.9044	2.1947	204.4	0.7802	3.0681	26.3923	83.8763	16.4769	169.9	0.902297	low
TCGA-BP-4787	1.31507	1	7.0621	2.8355	2.0323	355.297	1.1248	3.6524	15.5847	61.3497	8.4447	104.139	1.67156	high
TCGA-CJ-6033	0.613699	1	6.49	0.8794	3.792	1000.37	0.8628	21.6356	13.9964	50.9221	2.0208	148.165	2.24031	high
TCGA-A3-A6NL	1.88767	0	12.1833	0.1362	2.404	339.929	1.1105	14.6586	14.4733	35.9924	3.2473	180.059	1.36705	high
TCGA-CJ-4873	4.86575	0	15.995	0.8304	7.9191	487.459	3.6692	5.2257	20.6838	69.5208	2.6062	68.8774	2.5255	high
TCGA-B8-A54F	1.42192	0	17.6238	2.2448	1.2631	194.445	0.3485	2.5055	15.3165	72.3911	3.2523	196.428	1.10984	high
TCGA-BP-5201	2.60548	0	17.4641	0.0741	3.7252	588.408	6.3021	20.8563	24.0626	51.6593	4.659	135.005	1.90859	high
TCGA-BP-4346	4.09041	1	21.4814	1.1044	1.9576	208.802	12.5661	5.0882	21.7854	43.0077	2.4553	123.151	1.62976	high
TCGA-CW-5589	6.51507	0	23.0676	0.8041	1.0069	328.307	0.7494	5.7131	31.8729	59.2387	5.0977	420.471	0.318971	low
TCGA-B8-5550	4.04384	0	7.4098	4.3426	0.2817	242.439	0.3169	3.919	35.4732	46.5889	11.5987	130.428	0.997992	low
TCGA-B2-5635	2.06849	0	14.0459	0.132533	0.4799	283.792	2.29803	4.0702	13.5943	45.3052	5.6744	172.026	1.07398	high
TCGA-BP-4983	3.87123	0	4.6464	2.2147	1.904	379.593	11.4744	0.8059	6.0636	65.624	2.2389	25.6946	3.76413	high
TCGA-B0-5085	2.10959	1	23.3078	0.0852	2.923	443.669	2.027	21.4472	34.0854	49.7958	4.1865	200.617	1.0835	high
TCGA-B0-5400	4.74795	0	10.0482	2.4264	2.616	533.993	2.2998	6.5478	26.662	51.3927	0.769	131.876	1.61714	high
TCGA-BP-4784	5.07945	0	21.5833	2.4471	1.6805	371.97	0.2003	4.0873	9.5876	38.3002	1.2888	255.757	0.791097	low
TCGA-A3-3363	0.873973	0	42.8666	0.6613	0.1516	131.267	0.3715	0.524	66.0075	11.6151	16.4628	13.7514	0.441978	low
TCGA-B8-4621	2.1589	0	20.1357	0.0704	1.714	117.369	0.4789	0.1663	68.2276	25.0808	122.853	18.2461	0.0421465	low
TCGA-A3-3367	6.21918	0	17.0528	1.1296	0.5777	324.273	0.4683	6.4981	26.6347	92.981	21.0952	216.685	0.665199	low
TCGA-EU-5906	0.564384	0	14.0389	0.1285	0.4996	227.302	0.6729	9.2885	32.8492	43.5517	3.6451	312.067	0.559109	low
TCGA-B0-4701	0.652055	1	5.9683	1.0199	1.7749	546.52	0.984	3.5097	18.5017	84.2951	5.8501	108.171	1.8547	high
TCGA-CJ-6030	6.29863	1	11.5253	0.1281	0.7618	409.074	1.7199	3.7742	21.0718	44.7431	14.3572	112.028	1.03494	high
TCGA-B0-5107	2.53973	1	21.2989	0.0189	0.6801	798.125	3.7785	0.9972	27.1583	150.637	52.0028	6.3422	0.833456	low
TCGA-CZ-5464	5.83014	0	10.722	1.1027	0.6301	331.544	3.6429	19.2537	29.9735	67.6352	5.5305	99.7432	2.05605	high
TCGA-BP-4329	2.31507	1	5.4024	1.5061	0.9134	571.026	0.5734	18.7212	30.4975	86.5301	9.1831	357.716	0.724608	low
TCGA-BP-4993	0.484932	0	9.4265	1.5969	1.5799	325.705	1.7223	6.5566	17.6813	29.3763	6.2063	431.932	0.384704	low
TCGA-BP-5178	5.23836	1	6.7686	0.0615	2.2498	721.061	0.9396	1.4118	20.3598	75.6012	12.0765	116.724	1.34106	high
TCGA-CW-5583	6.81918	0	21.1548	2.0643	0.5271	206.961	0.8046	3.6465	29.3192	53.914	4.3035	512.266	0.22416	low
TCGA-B4-5838	0.454795	0	10.167	2.4526	0.4963	671.643	0.5165	2.7703	45.6717	48.3283	2.3757	147.16	0.971822	low
TCGA-B0-5121	4.06849	0	8.8293	0.0677	1.808	639.303	2.2287	26.8889	14.3336	67.2825	7.2962	555.018	0.419199	low
TCGA-CJ-4920	0.380822	1	10.4854	0.5557	1.8386	426.489	0.9264	19.3042	16.0599	48.4065	10.6889	167.175	1.37191	high
TCGA-B2-5639	2.74795	1	15.5783	0.1854	1.4245	316.277	1.4974	1.7551	29.2902	75.2828	31.4545	58.6474	0.828728	low
TCGA-CW-5587	6.09863	0	12.1895	0.5892	0.6976	176.24	6.0062	6.8351	23.7824	32.9391	5.5478	335.765	0.567587	low
TCGA-CZ-5455	1.53699	1	9.8421	0.5755	1.1502	319.268	3.2335	3.2965	21.9738	35.5065	6.4967	326.182	0.54335	low
TCGA-B0-5702	5.95068	0	12.073	7.4249	1.7556	249.414	0.1698	1.327	9.7357	71.0762	3.21	126.844	1.83164	high
TCGA-CJ-4870	4.10411	0	13.0248	0.0496	4.5181	599.196	0.4993	7.7644	28.8302	72.3718	7.4629	725.073	0.128144	low
TCGA-B0-5083	2.86301	1	15.6236	4.637	0.635	124.636	0.5375	1.152	2.4024	14.1682	0.8072	507.347	0.288028	low
TCGA-B0-4852	3.07123	1	8.9635	0.508	1.1327	379.696	1.2381	5.7248	17.8019	47.2214	9.2413	196.644	0.957215	low
TCGA-BP-4160	7.89315	0	6.7355	1.3296	1.7741	311.92	4.8898	3.2673	24.6898	57.9065	4.6281	202.228	1.17167	high
TCGA-B8-5553	1.19178	0	15.2274	0.548	0.7304	304.698	1.7489	2.1036	28.6512	28.0768	14.2549	456.68	0.201215	low
TCGA-CJ-4634	9.58356	0	15.5854	1.061	1.4273	250.312	0.6536	3.7794	38.2663	61.5075	13.4818	308.604	0.422858	low
TCGA-BP-4994	3.58356	0	23.9344	0.2949	1.6735	116.106	0.6949	1.9946	9.5327	55.5956	0.6158	183.853	1.0792	high
TCGA-CJ-4892	4.16712	0	16.1292	0.845	1.6502	381.52	4.854	11.9645	23.6021	46.4125	5.2575	213.808	1.05248	high
TCGA-AS-3778	0.117808	0	22.7585	0.5722	1.5752	237.674	0.3927	3.3675	33.1108	44.1991	10.5679	240.561	0.508455	low
TCGA-BP-4170	6.41918	1	11.3254	0.4539	0.9532	273.976	1.615	20.3143	27.6909	46.7853	9.5522	304.031	0.713196	low
TCGA-CZ-4863	5.28219	0	10.4903	0.1872	3.9807	230.239	5.3986	6.6299	26.6474	47.6337	11.0401	273.913	0.746489	low
TCGA-CW-5580	5.38082	1	17.749	0.9557	1.2962	338.744	0.3424	2.5157	23.6012	44.0643	3.2593	289.209	0.583413	low
TCGA-A3-3358	3.58082	0	9.6269	0.8466	1.321	426.615	1.7824	7.4597	13.8015	102.045	4.3133	117.147	2.2015	high
TCGA-B0-5094	0.912329	1	11.1617	0.1783	1.3422	394.473	1.9855	2.6995	31.3708	24.732	3.6831	35.6817	1.53041	high
TCGA-BP-4341	4.35342	1	17.4774	0.0414	2.4767	402.815	0.4375	7.5209	25.9762	32.4712	5.2261	459.563	0.288608	low
TCGA-B8-4154	3.78082	0	16.7362	0.2414	2.9611	509.533	2.1244	8.8762	34.6445	71.1352	7.8056	243.445	0.805063	low
TCGA-B0-4713	0.553425	1	17.6644	0.5698	3.2247	502.759	3.9452	7.7639	45.0263	139.943	3.7424	61.5904	2.50417	high
TCGA-BP-4768	1.09589	0	19.1863	0.0541	1.6823	311.321	0.5454	3.1157	35.4264	55.8975	23.3014	70.8086	0.790636	low
TCGA-A3-3380	1.55342	0	14.5749	0.5452	0.732	478.382	0.5351	6.6746	25.3869	62.2921	4.0442	319.476	0.604234	low
TCGA-BP-5177	0.80274	0	11.1497	2.3992	2.4433	513.505	0.7876	39.4841	16.7686	57.2905	2.9812	257.756	1.85095	high
TCGA-A3-3317	4.08493	0	11.676	3.3463	0.2028	262.095	1.7069	7.3356	17.14	40.5309	0.9486	195.488	1.1892	high
TCGA-B0-5701	6.74247	0	13.0049	0.0969	1.111	368.011	0.7609	1.3104	25.0903	71.3685	20.8656	127.254	0.841423	low
TCGA-BP-5198	1.65205	0	8.161	4.7712	1.7021	455.92	0.4605	3.8382	13.5397	53.9663	9.1351	108.486	1.56718	high
TCGA-CJ-4644	0.920548	1	10.7434	0.3159	1.9084	244.279	3.1481	6.4698	27.1278	48.264	9.9178	218.571	0.840451	low
TCGA-CJ-4899	4.1863	0	11.8988	1.9941	0.6527	230.17	0.7716	5.7901	12.8662	20.7352	3.6519	573.545	0.210381	low
TCGA-B8-A54D	2.27397	0	16.4491	0.216	2.1899	212.812	6.4989	0.7069	20.384	46.7964	6.4635	73.329	1.58158	high
TCGA-BP-5176	4.35616	1	14.4104	0.1752	2.4675	384.956	1.2108	11.5109	41.9662	44.1503	1.6784	278.149	0.693628	low
TCGA-B0-4691	0.380822	1	19.0446	2.0726	0.4033	810.82	3.7102	21.4641	16.1151	127.605	7.9017	41.7191	3.52888	high
TCGA-BP-4782	0.969863	0	17.166	1.3065	0.7365	325.732	2.3068	6.7494	26.9835	46.1799	10.6336	187.439	0.806138	low
TCGA-CJ-5671	10.9233	0	7.6698	2.9543	2.2749	671.684	1.1948	6.8098	10.6485	53.3967	5.7451	168.373	1.46098	high
TCGA-BP-4999	3.46849	0	15.0989	0.4867	1.1894	259.222	0.4065	8.2244	17.33	40.4983	1.2246	444.286	0.394632	low
TCGA-BP-4988	2.26849	1	5.0322	0.8293	3.7751	334.662	1.8193	7.6399	10.5615	24.2614	2.9394	115.263	1.84569	high
TCGA-CZ-5451	5.28493	0	24.3213	0.0708	2.5998	355.039	1.0394	4.3251	36.6303	53.7337	8.6824	478.887	0.213027	low
TCGA-BP-4756	1.02466	0	30.473	0.1149	0.592	144.082	1.0781	0.9037	67.4307	17.6333	2.9145	45.2187	0.700186	low
TCGA-AK-3428	10.2137	0	9.877	0.2047	0.8048	412.994	0.1575	2.2457	28.1628	59.5961	3.4359	225.503	0.841776	low
TCGA-CW-5590	2.94521	1	9.9658	1.0772	1.4589	766.527	1.4416	4.8917	18.5844	74.3353	7.6293	231.623	0.972765	low
TCGA-BP-4801	3.07945	0	15.229	3.4529	1.4781	360.994	1.362	9.6016	19.8697	49.696	5.2113	266.467	0.836048	low
TCGA-MW-A4EC	1.36438	0	12.8782	0.3306	0.8705	277.692	0.4769	3.7088	23.4094	41.813	4.8511	373.041	0.425276	low
TCGA-B8-4151	3.5589	0	16.2743	0.0565	1.3696	497.985	0.2078	2.3541	42.533	64.964	9.4605	272.014	0.490548	low
TCGA-CZ-5467	0.2	1	10.6319	0.1867	1.2209	363.615	0.3353	2.6623	31.128	91.5066	1.034	226.463	1.04718	high
TCGA-BP-5202	0.0794521	0	12.5294	0.6632	1.3503	307.006	0.6328	1.7704	39.9704	63.9169	7.8064	344.478	0.41967	low
TCGA-B0-4817	2.79178	1	9.9091	0.2276	2.8468	428.399	1.313	2.2799	17.8123	65.8691	8.4162	15.8318	2.19797	high
TCGA-CJ-4895	3.28767	1	8.7682	3.2857	1.4739	303.332	1.6321	8.8376	27.6708	39.0446	0.743	152.899	1.42241	high
TCGA-B0-4699	0.30137	1	10.3544	3.2371	3.375	476.757	5.764	0.7783	2.763	15.5326	0.6897	96.9957	1.97963	high
TCGA-CJ-6032	9.96986	0	12.3257	0.1011	1.4867	191.057	1.0064	3.1086	26.8921	59.7362	10.1652	291.083	0.566993	low
TCGA-B0-5710	6.65753	0	10.8761	0.2002	2.357	427.012	0.5719	7.4149	13.0358	39.7984	6.5905	378.742	0.505153	low
TCGA-AK-3445	6.55342	0	12.0403	0.3891	2.3938	806.936	1.0632	4.8566	11.1238	31.0641	1.6205	50.5969	1.98015	high
TCGA-BP-4970	1.1863	0	15.4709	3.473	1.1203	330.5	1.4389	4.1328	15.5672	28.7979	16.642	438.802	0.255768	low
TCGA-BP-4342	6.18082	1	6.8801	3.048	1.7684	401.705	1.0207	11.3897	18.6021	58.8817	12.7652	145.522	1.39246	high
TCGA-BP-4963	5.02466	0	11.7258	0.2524	1.0587	230.576	1.7449	14.3195	26.2963	108.613	8.6801	86.972	2.21726	high
TCGA-BP-4775	5.04932	0	12.9445	0.4637	0.7322	196.349	1.0445	5.0716	20.6495	20.6705	11.9312	284.55	0.483822	low
TCGA-BP-4770	0.90137	1	13.4323	57.1616	58.6598	552.56	0.523	1.8969	1.7663	30.9508	0.3217	254.118	19.8051	high
TCGA-BP-5173	0.169863	1	15.5578	0.5319	1.4116	364.701	3.5293	11.4467	27.889	110.605	11.2452	236.735	1.05953	high
TCGA-CJ-4887	2.55342	1	11.9026	0.0988	4.3414	445.477	7.23	4.0448	26.4907	45.3179	6.875	160.63	1.27063	high
TCGA-B2-4101	1.77534	0	10.9905	0.5973	1.3272	420.027	1.9156	7.9479	17.7316	58.9819	8.586	169.716	1.1992	high
TCGA-BP-4981	3.00548	1	12.083	0.0545	2.9918	602.351	1.2245	9.5456	24.6027	77.3681	2.9598	113.819	1.86669	high
TCGA-CJ-5675	10.7836	0	21.4245	0.2207	2.2632	559.032	7.196	1.7487	32.4909	66.0845	16.728	84.4389	1.08047	high
TCGA-B0-4845	5.4411	1	15.8623	0.0423	1.5948	332.344	0.5223	9.9122	25.331	82.0789	4.705	321.596	0.703342	low
TCGA-CJ-4894	2.30411	1	22.331	0.238	2.3188	329.693	7.0889	10.8829	15.3958	59.8737	11.2319	212.469	1.00961	low
TCGA-BP-4974	0.578082	1	6.1509	0.3745	0.9545	345.68	0.7871	27.0492	12.5171	43.2045	3.1232	233.641	1.53739	high
TCGA-AK-3458	3.2	0	14.4505	0.7035	4.3813	418.399	0.9175	8.6829	35.2898	130.59	7.4356	106.905	2.06702	high
TCGA-BP-4354	2.83288	1	4.3485	1.5835	1.214	554.438	1.8016	4.4704	3.3514	52.9338	1.8399	66.0628	2.52966	high
TCGA-B0-4846	3.28767	1	11.1681	0.6827	0.4471	213.367	2.8676	8.5906	25.29	47.5665	7.6876	249.065	0.78519	low
TCGA-BP-4161	7.52329	0	6.8108	0.0692	0.7881	348.912	4.3561	3.3736	26.1277	51.3261	13.14	134.323	1.09454	high
TCGA-B0-5693	11.1616	0	10.4181	0.4856	0.9596	307.161	0.2621	2.9492	22.3961	63.6041	2.929	350.677	0.568529	low
TCGA-B8-4143	1.94247	1	6.4342	0.4807	0.7896	1046.34	5.747	7.3593	9.6288	50.682	0.412	38.6718	2.8925	high
TCGA-B0-5697	7.20548	0	22.1584	0.7633	2.3398	222.556	3.6414	5.341	27.8183	34.2714	17.0992	125.948	0.79882	low
TCGA-AS-3777	3.39178	0	18.9971	1.47	4.5433	40.7051	0.3104	0.9703	17.8442	38.0389	17.9267	65.5676	1.10883	high
TCGA-B0-4833	6.53699	1	18.7128	0.4378	2.9156	394.027	3.4294	5.9395	17.6124	59.9235	3.0158	261.172	0.902857	low
TCGA-A3-3323	3.03014	0	8.2014	0.2806	1.9402	247.429	1.2082	5.3359	25.7223	58.4388	5.2376	212.721	1.01085	low
TCGA-BP-4799	3.10411	1	2.6598	0.4929	4.2478	561.628	1.321	33.3841	2.3226	27.3019	3.5077	156.501	2.85052	high
TCGA-CJ-5689	8.21918e-06	1	10.6633	2.2428	3.3573	522.424	1.5824	9.8745	16.7944	42.3228	6.3293	257.793	0.937484	low
TCGA-BP-4355	2.61096	1	7.5486	0.4493	1.5766	633.118	0.2321	33.632	15.6847	36.5395	2.3704	328.823	1.10313	high
TCGA-CJ-5672	5.40274	1	12.672	0.187	2.1643	294.784	5.5198	4.1136	19.5646	37.1981	7.9543	183.445	1.0232	low
TCGA-B0-4838	2.28493	1	10.602	0.2805	3.0697	172.24	6.2388	3.3007	21.2769	53.9508	6.4508	292.49	0.790876	low
TCGA-CZ-5457	7.54521	0	14.8307	0.4048	2.0639	388.134	0.735	5.7436	22.5243	59.6137	43.383	518.974	0.101206	low
TCGA-CW-5591	6.22192	0	29.9488	13.3664	0.037	148.508	0.299	1.1215	28.2823	14.3904	54.3368	179.635	0.192578	low
TCGA-BP-5200	2.91233	0	20.7287	0.9247	1.4885	269.945	1.8216	8.762	14.5969	38.2761	12.792	373.848	0.385979	low
TCGA-BP-5187	1.11233	0	11.9287	3.6139	1.8437	635.364	0.8447	13.9997	25.2567	47.9464	9.3426	323.836	0.633103	low
TCGA-A3-A8OU	8.21918e-06	0	15.4662	0.6367	1.9997	264.551	0.8698	14.4112	30.8579	39.7147	1.8491	319.496	0.655441	low
TCGA-CZ-5988	1.89863	0	13.0498	0.2033	0.7319	564.748	0.9695	2.1542	14.5066	31.8375	5.5817	178.725	0.912869	low
TCGA-CJ-6031	5.22192	0	11.4554	4.9225	1.5175	622.9	2.6192	18.6888	18.3467	54.8005	2.3699	166.767	1.86049	high
TCGA-BP-4159	7.12603	1	6.7214	0.6819	1.5619	850.123	0.8813	24.4073	18.9058	69.5243	5.674	248.921	1.3864	high
TCGA-BP-4353	1.0274	1	5.193	0.1011	1.8122	590.288	1.017	3.228	11.9776	39.718	2.3664	290.968	0.803296	low
TCGA-AK-3453	6.93425	0	24.426	0.225	1.3051	454.082	4.3564	5.5432	19.5755	64.8843	12.3716	101.156	1.19078	high
TCGA-DV-5569	0.972603	0	10.4819	0.733	0.645	447.276	1.2135	6.8787	19.2257	58.2393	6.3793	143.617	1.31408	high
TCGA-B4-5834	0.10411	0	15.6557	0.3908	0.7612	376.363	0.6134	6.211	21.1466	49.5383	0.6282	355.978	0.5434	low
TCGA-B8-5165	2.01918	0	15.1721	5.7822	0.2492	379.209	0.6789	3.8246	27.7754	37.9587	9.5428	515.018	0.207847	low
TCGA-B0-4841	0.558904	1	13.0438	0.4115	4.3165	604.302	0.6172	23.0985	4.7433	41.5627	2.0178	228.161	1.60824	high
TCGA-BP-4174	5.14795	0	6.1773	0.051	2.5549	260.407	1.3045	2.8997	20.0944	85.9701	0.3414	62.2052	2.60352	high
TCGA-CJ-4905	4.09863	0	13.9044	3.0277	2.0958	342.912	0.7761	9.3487	20.1568	57.1999	6.5232	481.263	0.356461	low
TCGA-A3-3376	4.64658	1	10.1224	5.1505	0.5994	310.093	0.8556	14.1943	11.1017	32.1216	4.0494	358.761	0.687332	low
TCGA-B8-A8YJ	1.18082	0	7.1818	9.7288	2.4711	411.955	0.6584	14.1828	7.22	14.9341	2.9644	523.122	0.414693	low
TCGA-AK-3434	5.71781	0	14.1642	0.6711	1.0995	538.619	1.5258	3.893	19.4567	75.727	11.058	394.313	0.419251	low
