# Supplementary material
Source: Research Square preprint supplement (doi:10.21203/rs.3.rs-9129596/v1)
Supplement: Supplementary file 4 [file ffd41a4e38d5c8e65972ef9c.xlsx]

## Sheet: Tables S1
Tables S1. Folate metabolism related genes (FMRGs)
AASDHPPT
ABCA1
ABCB1
ABCC4
ABO
ACHE
ACTB
ADAM17
ADH1B
ADH5
ADPRH
ADSL
AFP
AHCY
AKAP9
AKR1A1
ALB
ALDH1A2
ALDH1L1
ALDH1L2
ALDH2
ALDH9A1
ALX1
ALX3
ALX4
AMBRA1
AMD1
AMN
AMT
ANKRD6
AOX1
APOA5
APOE
ARG2
ARL13B
ATIC
ATM
BAG6
BCHE
BCKDK
BCO1
BDNF
BHMT
BHMT2
BMP4
BRCA1
BRCA2
C2CD3
CAMKK1
CARTPT
CASP3
CBS
CCK
CCL2
CD320
CD36
CD55
CDH1
CDH13
CDKN2A
CDX2
CECR2
CELSR1
CELSR2
CELSR3
CERNA3
CERS6
CETP
CGB7
CHDH
CHEK2
CHKA
CHRD
CITED2
COMT
COQ3
CRABP1
CRABP2
CRP
CSN1S1
CST3
CTH
CTNNB1
CTPS2
CUBN
CXCL8
CYP1A1
CYP26A1
CYP26B1
CYP26C1
CYP2A6
CYP2C19
CYP2C9
CYP2D6
CYP2E1
DAAM1
DACT1
DACT2
DDC
DHFR
DHFR2
DHPS
DLC1
DLEU1
DNMT1
DNMT3A
DNMT3B
DNMT3L
DPYD
DPYD-AS1
DRD4
DROSHA
DVL1
DVL2
DVL3
ELK1
EMSLR
EN2
EPHX1
EPO
EPRS1
ERBB2
ERCC1
ERCC2
ERCC3
ERCC4
ERCC5
ETFA
FAS
FASLG
FDXR
FGF2
FGF8
FKBP8
FOLH1
FOLR1
FOLR2
FOLR3
FOXD3
FPGS
FRA10A
FTCD
FTCD-AS1
FTH1
FUT2
FUZ
FZD3
FZD6
FZD9
GADD45A
GAMT
GAPDH
GART
GATA1
GCM1
GCSH
GDF6
GFAP
GGH
GGT1
GHRL
GLDC
GLI1
GLI2
GLI3
GNAS-AS1
GNMT
GPR161
GRHL1
GRHL2
GRHL3
GSTM1
GSTP1
GSTT1
H19
H2AC18
H3-7
HES7
HLA-DQA1
HLA-DQB1
HNRNPH2
HOXB1
HTT
ICMT
IFT88
IGF2
IGF2-AS
IL10
IL1B
IL1RN
INS
INVS
IRF6
ISL1
ITGB1
ITPK1
ITPR1
IZUMO1R
JUN
KCNQ1OT1
KMT5B
KRAS
KTI12
LACTB
LIAS
LIG4
LINC01672
LMBRD1
LOC126862536
LRP2
LRP5
LRP6
MAPK1
MAPK3
MAPK9
MARCKS
MARCKSL1
MAT1A
MAT2A
MAT2B
MDM2
ME1
MEG3
MESP2
MGMT
MIR1266
MIR149
MIR22
MIR3156-1
MIR499A
MIR505
MIR561
MIR616
MIR6778
MIR9-1
MIR9-3HG
MIRLET7G
MLH1
MLYCD
MMAA
MMUT
MNX1
MS
MSH3
MSX1
MSX2
MTHFD1
MTHFD1L
MTHFD2
MTHFD2L
MTHFR
MTHFS
MTR
MTRR
MT-TK
MT-TL1
MYEOV
NAGS
NAP1L2
NAT1
NAT2
NCOA3
NES
NF1
NFKB1
NFKB2
NGF
NNMT
NOG
NOS1
NOS2
NOS3
NOTCH1
NPY
NQO1
NQO2
NR2E3
NRF1
OGG1
OTUD5
OTX2
PAPPA
PARD3
PAX1
PAX2
PAX3
PAX6
PAX7
PCBP1
PCMT1
PCSK9
PCYT1A
PDGFRA
PEMT
PHGDH
PLEKHB1
PLK1
PNPLA8
POLG
PON1
PORCN
PRICKLE1
PRICKLE2
PRKCA
PRKN
PRMT1
PRMT2
PRSS8
PTCH1
PTGDS
PTK7
PTS
QDPR
RAB23
RAD51
RAD54L
RAD9B
RASSF1
RELA
RELN
RFC1
RFX1
RNMT
ROCR
RRM2
RUNX3
SARDH
SCRIB
SEC24B
SELENOH
SERPINA3
SHH
SHMT1
SHMT2
SHROOM3
SIRT4
SIX3
SLC19A1
SLC19A2
SLC25A32
SLC46A1
SLC6A19
SMAD5-AS1
SNORA70
SNORA70C
SNORD16
SNORD3B-1
SNORD46
SOD2
SOD2-OT1
SOX10
SOX2
SOX3
SOX9
SPTBN1
ST20-MTHFS
SUFU
TAGLN2
TBX1
TBX6
TBXT
TCN1
TCN2
TFAP2A
TGFB1
TGFBR1
TIMP3
TMEM67
TMX2-CTNND1
TP53
TP53BP1
TP73
TPMT
TRD-GTC9-1
TRDMT1
TRPM6
TTC21B
TULP3
TYMP
TYMS
TYMSOS
UBE2D2
UCP2
UGT1A1
UMPS
UROC1
VANGL1
VANGL2
VDR
VEGFA
VIM
WNT1
WNT11
WNT3A
WNT4
WNT5A
WNT7A
XIST
XK
XPA
XPC
XRCC1
XRCC2
XRCC3
ZBTB25
ZIC1
ZIC2
ZIC3
ZIC5
ZNF699
